# Supplementary material for: Borylated norbornadiene derivatives: Synthesis and application in Pd-catalyzed Suzuki–Miyaura coupling reactions
Source: publisher site journal article supplement (doi:10.3762/bjoc.18.41), 2022-04-01
Supplement: Additional file 1 [file 1860-5397-18-41-S1.pdf]

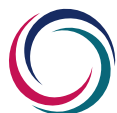

## Supporting Information

for

### **Borylated norbornadiene derivatives: Synthesis and application in Pd-catalyzed Suzuki–Miyaura coupling reactions**

Robin Schulte and Heiko Ihmels

*Beilstein J. Org. Chem.* **2022**, *18*, 368–373. [doi:10.3762/bjoc.18.41](https://doi.org/10.3762/bjoc.18.41)

### **Experimental protocols and NMR spectra**

## Table of contents

|     |                                                 |     |
|-----|-------------------------------------------------|-----|
| 1   | Experimental section .....                      | S2  |
| 1.1 | Materials .....                                 | S2  |
| 1.2 | Equipment.....                                  | S2  |
| 1.3 | Methods .....                                   | S2  |
| 1.4 | Synthesis .....                                 | S2  |
| 1.5 | Parameters of the photometric experiments ..... | S8  |
| 2   | NMR spectra .....                               | S9  |
| 3   | References.....                                 | S34 |

## 1 Experimental section

### 1.1 Materials

Commercially available reagents were obtained from Acros Organics (*n*-BuLi, *t*-BuLi, CsF), Alfa Aesar [norbornadiene, (BPin)<sub>2</sub>, 1-bromonaphthalene, 2-bromoanisole, 3-bromoanisole, 4-bromoanisole, 2-bromotoluene, 2-bromopyridine, 1-bromo-2-nitrobenzene, 4-iodobenzonitrile, 4-iodoanisole, (*t*-Bu)<sub>3</sub>PHBF<sub>4</sub>], Carl Roth [Pd(PPh<sub>3</sub>)<sub>4</sub>, Pd(dba)<sub>3</sub>] and Merck (*t*-BuOK, bromobenzene). Technical-grade solvents were distilled prior to use. THF was stirred under reflux with a Na wire and distilled prior to use. Column chromatography was carried out with silica gel 60 M (0.0063–0.25 mm) from Macherey Nagel GmbH & Co. KG. 2,3-Dibromonorbornadiene, 2-bromo-3-methylnorbornadiene and 3-iodo-4-methoxybenzonitrile were synthesized according to literature protocols [1,2].

### 1.2 Equipment

The NMR spectra were recorded on a JEOL ECZ 500 spectrometer (<sup>1</sup>H: 500 MHz, <sup>13</sup>C: 125 MHz, 22 °C) or on a Varian 600 ASC (<sup>1</sup>H: 600 MHz, <sup>13</sup>C: 150 MHz). The spectra were referenced to DMSO-*d*<sub>6</sub> [ $\delta(^1\text{H}) = 2.05$  ppm,  $\delta(^{13}\text{C}) = 39.5$  ppm], CDCl<sub>3</sub> [ $\delta(^1\text{H}) = 7.26$  ppm,  $\delta(^{13}\text{C}) = 77.2$  ppm], MeCN [ $\delta(^1\text{H}) = 1.94$  ppm,  $\delta(^{13}\text{C}) = 118.3$  ppm] or acetone-*d*<sub>6</sub> [ $\delta(^1\text{H}) = 2.05$  ppm,  $\delta(^{13}\text{C}) = 29.8$  ppm, 206.0 ppm] and processed with the MestReNova software. The melting points were determined with a BÜCHI 545 (Büchi, Flawil, CH) and are uncorrected. Elemental analysis data were determined by Rochus Breuer (Organic Chemistry I, University of Siegen) on a HEKAtech EUROEA combustion analyzer. Mass spectra were recorded with an orbitrap mass spectrometer Thermo Fisher Exactive (driving current: 4 KV, capillary temperature: 250 °C, capillary voltage: 32.5 V, injection rate: 15  $\mu\text{L}/\text{min}$ , scanning range: 100–750 *m/z*, resolution: ultra-high) and processed with the Xcalibur software. The absorption spectra were measured on a Varian Cary 100 Bio absorption spectrometer with Hellma quartz glass cuvettes 115 F-QS (layer thickness *d* = 10 mm). The measurements were recorded at a temperature of *T* = 20 °C as adjusted with a thermostat if not stated otherwise. The irradiation of **5b** was performed with a LUMOS 43 from Atlas Photonics.

### 1.3 Methods

Reaction solutions were stirred with a magnetic stirring bar. Reaction temperatures refer to the medium that surrounded the reaction vessel. Solvents were usually removed under reduced pressure at 40–50 °C with a rotatory evaporator. Room temperature (rt) was approximately 22 °C. Air- and/or water-sensitive reactions were carried out under inert atmosphere with Schlenk equipment.

### 1.4 Synthesis

*4,4,5,5-Tetramethyl-2-(bicyclo[2.2.1]heptadien-2-yl)-1,3,2-dioxaborolane (2a)*

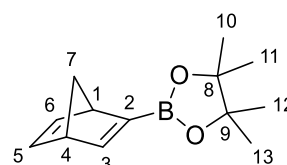

Under argon-gas atmosphere norbornadiene (1.5 g, 16 mmol, 1.6 mL) was added to a mixture of *t*-BuOK (881 mg, 7.87 mmol) in anhydrous THF (30 mL) at –78 °C, and the solution was stirred for 5 min at this temperature. Then, *n*-BuLi (7.9 mmol, 3.2 mL) was added dropwise at –78 °C over a period of 30 min and the resulting yellow solution was stirred for 30 min at –40 °C. After the mixture was cooled to –78 °C, a solution of bis(pinacolato)diborone (2.00 g,

7.87 mmol) in anhydrous THF (25 mL) was added dropwise. The reaction mixture was stirred for 1 h at  $-78\text{ }^{\circ}\text{C}$ , followed by stirring for 18 h at room temperature. Water (100 mL) was added and the aqueous layer was extracted with EtOAc (3  $\times$  80 mL). The combined organic layers were washed with brine (1  $\times$  100 mL), dried with sodium sulfate, and filtered. The solvent was removed under reduced pressure and the crude product (2.23 g) was purified by column chromatography (hexane/EtOAc 9:1, v.v,  $R_f$  = 0.63) to give **2a** as a colorless solid (1.18 g, 5.41 mmol, 69%); mp 47–48  $^{\circ}\text{C}$ . –  $^1\text{H-NMR}$  (500 MHz,  $\text{CDCl}_3$ ):  $\delta$  = 1.27 (s, 12H, 10-H, 11-H, 12-H, 13-H), 1.94–1.98 (m, 2H, 7-H), 3.65 (br. s, 1H, 4-H), 3.81 (br. s, 1H, 1-H), 6.66 (dd, 1H,  $^3J$  = 3.2 Hz,  $^3J$  = 4.5 Hz, 5-H), 6.80 (dd, 1H,  $^3J$  = 3.2 Hz,  $^3J$  = 4.9 Hz, 6-H), 7.60 (d, 1H,  $^3J$  = 2.9 Hz, 3-H). –  $^{13}\text{C-NMR}$  (125 MHz,  $\text{CDCl}_3$ ):  $\delta$  = 25.0 (C10, C 11, C12, C13), 52.3 (C4), 52.4 (C1), 75.2 (C7), 88.2 (C8, C9), 141.7 (C5), 144.4 (C6), 146.2 (C2), 161.3 (C3). – El. Anal. for  $\text{C}_{13}\text{H}_{19}\text{BO}_2$ : calc. (%): C 71.59, H 8.78, found (%): C 71.72, H 8.85.

*Potassium bicyclo[2.2.1]heptadien-2-yl trifluoroborate (3)*

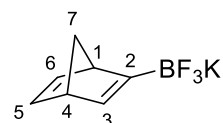

To a solution of **2a** (500 mg, 2.29 mmol) in MeOH (7.0 mL) was added an aqueous solution of  $\text{KHF}_2$  (4.5 M, 13 mmol, 2.9 mL), and the resulting suspension was stirred for 30 min at room temperature. The solvent was removed under reduced pressure (40 mbar, 55  $^{\circ}\text{C}$ ), and the residue was diluted with hot acetone (20 mL). After filtration, the solvent of the filtrate was removed under reduced pressure and the residue was treated with  $\text{Et}_2\text{O}$  (50 mL). The precipitate was filtered off and washed with  $\text{Et}_2\text{O}$  (20 mL) to yield **3** as a white solid (326 mg, 1.65 mmol, 72%); mp 220–225  $^{\circ}\text{C}$ . –  $^1\text{H-NMR}$  (500 MHz, acetone- $d_6$ ):  $\delta$  = 1.69–1.74 (m, 2H, 7-H), 3.35 (br. s, 1H, 4-H), 3.55 (br. s, 1H, 1-H), 6.37 (br. s, 1H, 3-H), 6.51–6.55 (m, 1H, 5-H), 6.60–6.63 (m, 1H, 6-H). –  $^{13}\text{C-NMR}$  (125 MHz, acetone- $d_6$ ):  $\delta$  = 51.2 (C4), 53.7 (C1), 74.2 (C7), 140.3 (C3), 142.8 (C5), 144.8 (C6).

*4,4,5,5-Tetramethyl-2-(3-methylbicyclo[2.2.1]heptadien-2-yl)-1,3,2-dioxaborolane (2b)*

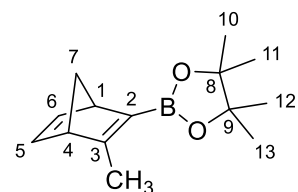

$t\text{-BuLi}$  (1.90 M, 7.50 mmol, 3.95 mL) was added dropwise under argon gas atmosphere to a solution of 2-bromo-3-methylnorbornadiene (694 mg, 3.75 mmol) in anhydrous THF (15 mL) at  $-78\text{ }^{\circ}\text{C}$ , and the resulting yellow solution was stirred for 40 min at  $-78\text{ }^{\circ}\text{C}$ . A solution of bis(pinacolato)diborane (2.00 g, 7.87 mmol) in anhydrous THF (10 mL) was added at  $-78\text{ }^{\circ}\text{C}$  and the colorless solution was stirred for 45 min at  $-78\text{ }^{\circ}\text{C}$  and subsequently for 1 h at room temperature. Water (25 mL) was added, the layers were separated, and the aqueous layer was extracted with  $\text{Et}_2\text{O}$  (3  $\times$  30 mL). The combined organic layers were washed with water (1  $\times$  50 mL) and brine (1  $\times$  50 mL), dried with sodium sulfate, and filtered. The solvent was removed under reduced pressure and the crude product was purified by column chromatography (hexane/EtOAc 9:1, v.v,  $R_f$  = 0.59) to give **2b** (130 mg, 560  $\mu\text{mol}$ , 15%) as a colorless liquid.  $^1\text{H-NMR}$  (600 MHz,  $\text{CDCl}_3$ ): 1.25 (s, 12H, 10-H, 11-H, 12-H, 13-H), 1.86–1.87 (m, 1H, 7-H), 1.92–1.93 (m, 1H, 7-H), 2.12 (s, 3H,  $\text{CH}_3$ ), 3.29 (br. s, 1H, 4-H), 3.75 (br. s, 1H, 1-H), 6.68 (dd, 1H,  $^3J$  = 3.1 Hz,  $^3J$  = 4.8 Hz, 5-H), 6.79 (dd, 1H,  $^3J$  = 3.1 Hz,  $^3J$  = 4.9 Hz, 6-H). –  $^{13}\text{C-NMR}$  (150 MHz,  $\text{CDCl}_3$ ): 18.4 ( $\text{CH}_3\text{C}$ ), 25.1 (C10, C11, C12, C13), 52.9 (C1), 57.8 (C4), 72.6 (C7), 82.7 (C8, C9), 140.3 (C5), 144.9 (C6), 174.4 (C3). – HRMS for  $\text{C}_{14}\text{H}_{21}\text{BO}_2$ : calcd. 232.1629  $[\text{M} + \text{H}]^+$ ; found 232.1701  $[\text{M} + \text{H}]^+$ . – El. Anal. for  $\text{C}_{14}\text{H}_{21}\text{BO}_2$ : calc. (%): C 72.44, H 9.12, found (%): C 72.55, H 9.27.

*General procedure A (GP A) for Pd-catalyzed Suzuki–Miyaura coupling reaction of borylated norbornadiene derivatives with aryl halides*

Under anaerobic conditions, an aqueous NaOH solution (1.0 M, 1.4 mmol, 1.4 mL, 3.3 molar equiv) was added to a suspension of the aryl halide (418  $\mu\text{mol}$ , 1.00 molar equiv), norbornadiene **2a** or **2b** (459  $\mu\text{mol}$ , 1.10 equiv) and  $\text{Pd}(\text{PPh}_3)_4$  (20.9  $\mu\text{mol}$ , 5 mol %) in THF (4.0 mL). The resulting suspension was stirred for 18 h at 60 °C. After cooling the reaction mixture to room temperature, it was diluted with  $\text{Et}_2\text{O}$  (50 mL), dried with sodium sulfate and filtered. The solvents were removed under reduced pressure and the remaining crude was purified by column chromatography.

*General procedure B (GP B) for Pd-catalyzed Suzuki–Miyaura coupling reaction of borylated norbornadiene derivatives with aryl halides*

Under an argon gas atmosphere, a suspension of aryl halide (505  $\mu\text{mol}$ , 1.00 equiv), norbornadiene **2a** or **2b** (505  $\mu\text{mol}$ , 1.00 equiv), CsF (1.67 mmol, 3.30 equiv),  $\text{Pd}_2(\text{dba})_3$  (2 mol %) and  $(t\text{-Bu})_3\text{PHBF}_4$  (1 mol %) in oxygen-free THF (4.0 mL) was stirred for 18 h at room temperature. The solvent was removed under reduced pressure and the remaining crude was purified by column chromatography.

*2-Phenylnorbornadiene (5a)*

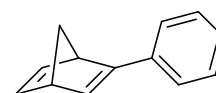

1. Bromobenzene (**4a**, 32.7 mg, 208  $\mu\text{mol}$ , 22.0  $\mu\text{L}$ ) and **2a** (50.0 mg, 229  $\mu\text{mol}$ ) were treated according to GP A. The crude product was purified by column chromatography (hexane,  $R_f = 0.37$ ) to provide **5a** as a colorless liquid (19.5 mg, 116  $\mu\text{mol}$ , 56%). NMR data were identical to those reported in the literature [3].

2. Bromobenzene (**4a**, 79.3 mg, 505  $\mu\text{mol}$ , 53.0  $\mu\text{L}$ ) and **2a** (111 mg, 505  $\mu\text{mol}$ ) were treated according to GP B. The crude product was purified by column chromatography (hexane,  $R_f = 0.37$ ) to provide **5a** as a colorless liquid (31.0 mg, 184  $\mu\text{mol}$ , 37%). NMR data were identical to those reported in the literature [3].

*2-(1-Naphthyl)-norbornadiene (5b)*

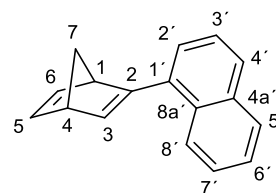

1-Bromonaphthalene (**4b**, 86.5 mg, 418  $\mu\text{mol}$ , 59.0  $\mu\text{L}$ ) and **2a** (100 mg, 459  $\mu\text{mol}$ ) were treated according to GP A. The crude product was purified by column chromatography (hexane,  $R_f = 0.61$ ) to provide **5b** as a colorless liquid (51.0 mg, 233  $\mu\text{mol}$ , 56%). –  $^1\text{H-NMR}$  (500 MHz,  $\text{CDCl}_3$ ):  $\delta = 2.18$  (d, 1H,  $^2J = 6.0$  Hz, 7-H), 2.39 (d, 1H,  $^2J = 6.0$  Hz, 7-H), 3.84–3.85 (m, 2H, 1-H, 4-H), 6.83 (d, 1H,  $^3J = 3.0$  Hz, 3-H), 6.89 (dd, 1H,  $^3J = 5.2$  Hz,  $^3J = 3.0$  Hz, 5-H), 7.07 (dd,  $^3J = 5.1$  Hz,  $^3J = 3.0$  Hz, 6-H), 7.28 (d, 1H,  $^3J = 7.1$  Hz, 2'-H), 7.42 (dd, 1H,  $^3J = ^3J = 8.0$  Hz, 3'-H), 7.46–7.49 (m, 2H, 6'-H, 7'-H), 7.72 (d, 1H,  $^3J = 8.2$  Hz, 4'-H), 7.83–7.86 (m, 1H, 5'-H), 8.12–8.15 (m, 1H, 8'-H). –  $^{13}\text{C-NMR}$  (125 MHz,  $\text{CDCl}_3$ ):  $\delta = 51.6$  (C4), 56.2 (C1), 73.5 (C7), 123.3 (C2'), 125.5 (C3'), 125.8 (C6'), 125.9 (C7'), 126.0 (C8'), 127.3 (C4'),

128.5 (C5'), 131.2 (C8a'), 134.0 (C4a'), 136.3 (C1'), 140.1 (C3), 142.8 (C6), 143.4 (C5), 156.1 (C2). – El. Anal. for C<sub>17</sub>H<sub>14</sub>: calc. (%): C 93.54, H 6.46, found (%): C 93.82, H 6.45.

#### 2-(2-Methylphenyl)-norbornadiene (**5c**)

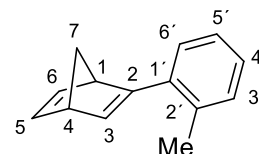

1-Bromo-2-methylbenzene (**4c**, 141 mg, 824  $\mu$ mol, 99.3  $\mu$ L) and **2a** (198 mg, 906  $\mu$ mol) were treated according to GP A. The crude product was purified by column chromatography (hexane,  $R_f$  = 0.57) and subsequent size exclusion chromatography (Sephadex, LH20, MeOH) to provide **5c** as a colorless liquid (57.3 mg, 315  $\mu$ mol, 38%). – <sup>1</sup>H-NMR (500 MHz, CDCl<sub>3</sub>):  $\delta$  = 2.08 (dt, 1H, <sup>2</sup> $J$  = 5.9 Hz, <sup>3</sup> $J$  = 1.5 Hz, 7-H), 2.19 (dt, 1H, <sup>2</sup> $J$  = 5.9 Hz, <sup>3</sup> $J$  = 1.6 Hz, 7-H), 2.35 (s, 3H, Me), 3.72–3.75 (m, 1H, 4-H), 3.77–3.80 (m, 1H, 1-H), 6.65 (d, 1H, <sup>3</sup> $J$  = 3.2 Hz, 3-H), 6.83 (dd, 1H, <sup>3</sup> $J$  = 4.3 Hz, <sup>3</sup> $J$  = 3.0 Hz, 5-H), 6.96 (dd, 1H, <sup>3</sup> $J$  = 5.0 Hz, <sup>3</sup> $J$  = 3.0 Hz, 6-H), 7.12–7.16 (m, 1H, 4'H), 7.18–7.21 (m, 3H, 3'H, 5'H, 6'H). – <sup>13</sup>C-NMR (125 MHz, CDCl<sub>3</sub>):  $\delta$  = 21.6 (Me), 51.3 (C4), 55.1 (C1), 73.0 (C7), 125.7 (C5'), 126.6 (C4'), 126.7 (C6'), 130.6 (C3'), 135.4 (C2'), 137.1 (C1'), 139.3 (C3), 142.6 (C6), 143.5 (C5), 156.8 (C2). – El. Anal. for C<sub>14</sub>H<sub>14</sub>: calc. (%): C 92.26, H 7.74, found (%): C 92.54, H 7.75.

#### 2-(4-Methoxyphenyl)-norbornadiene (**5d**)

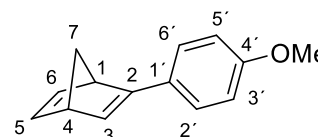

1-Bromo-4-methoxybenzene (**4d**, 94.4 mg, 505  $\mu$ mol, 63.4  $\mu$ L) and **2a** (121 mg, 556  $\mu$ mol) were treated according to GP A. <sup>1</sup>H NMR-spectroscopic analysis of the reaction mixture showed that the product was formed, but decomposed rapidly under the reaction conditions.

#### 2-(3-Methoxyphenyl)-norbornadiene (**5e**)

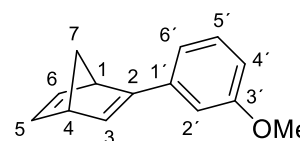

1-Bromo-3-methoxybenzene (**4e**, 142 mg, 758  $\mu$ mol, 96.1  $\mu$ L) and **2a** (182 mg, 834  $\mu$ mol) were treated according to GP A. The crude product was purified by column chromatography (hexane/EtOAc 9:1, v.v,  $R_f$  = 0.65) to provide **5e** as a colorless liquid (78.0 mg, 394  $\mu$ mol, 52%). – <sup>1</sup>H-NMR (500 MHz, CDCl<sub>3</sub>):  $\delta$  = 2.10 (dt, 1H, <sup>2</sup> $J$  = 6.3 Hz, <sup>3</sup> $J$  = 1.8 Hz, 7-H), 2.14 (dt, 1H, <sup>2</sup> $J$  = 6.3 Hz, <sup>3</sup> $J$  = 1.7 Hz, 7-H), 3.69–3.72 (m, 1H, 4-H), 3.82 (s, 3H, OMe), 3.90–3.92 (m, 1H, 1-H), 6.75 (dd, 1H, <sup>3</sup> $J$  = 8.2 Hz, <sup>4</sup> $J$  = 2.6 Hz, 4'-H), 6.79 (dd, 1H, <sup>3</sup> $J$  = 5.2 Hz, <sup>3</sup> $J$  = 3.0 Hz, 5-H), 6.89–6.91 (m, 2H, 3-H, 6-H), 6.95 (t, 1H, <sup>4</sup> $J$  = 1.6 Hz, 2'-H), 7.01 (dt, 1H, <sup>3</sup> $J$  = 7.8 Hz, <sup>4</sup> $J$  = 1.1 Hz, 6'-H), 7.24 (t, 1H, <sup>3</sup> $J$  = 8.0 Hz, 5'-H). – <sup>13</sup>C-NMR (125 MHz, CDCl<sub>3</sub>):  $\delta$  = 51.0 (C4), 51.7 (C1), 55.3 (OMe), 72.5 (C7), 110.4 (C2'), 112.5 (C4'), 117.5 (C6'), 129.5 (C5'), 136.7 (C3), 141.9 (C1'), 142.1 (C6), 143.5 (C5), 156.6 (C2), 159.9 (C3'). – El. Anal. for C<sub>14</sub>H<sub>14</sub>O x 0.5 H<sub>2</sub>O: calc. (%): C 81.13, H 7.29, found (%): C 81.01, H 7.05.

### 2-(2-Methoxyphenyl)-norbornadiene (**5f**)

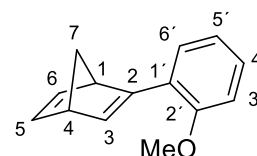

1-Bromo-2-methoxybenzene (**4f**, 142 mg, 758  $\mu\text{mol}$ , 95.0  $\mu\text{L}$ ) and **2a** (182 mg, 834  $\mu\text{mol}$ ) were treated according to GP A. The crude product was purified by column chromatography (hexane/EtOAc 9:1,  $v:v$ ,  $R_f$  = 0.69) to provide **5f** as a colorless liquid (48.2 mg, 243  $\mu\text{mol}$ , 32%). –  $^1\text{H-NMR}$  (500 MHz,  $\text{CDCl}_3$ ):  $\delta$  = 2.05 (dt, 1H,  $^2J$  = 6.0 Hz,  $^3J$  = 1.5 Hz, 7-H), 2.12 (dt, 1H,  $^2J$  = 6.0 Hz,  $^3J$  = 1.9 Hz, 7-H), 3.70–3.72 (m, 1H, 4-H), 3.86 (s, 3H, OMe), 3.97–4.00 (m, 1H, 1-H), 6.79 (dd, 1H,  $^3J$  = 5.1 Hz,  $^3J$  = 3.0 Hz, 5-H), 6.87 (dd, 1H,  $^3J$  = 8.3 Hz,  $^4J$  = 1.1 Hz, 3'-H), 6.91–6.97 (m, 2H, 6-H, 5'-H), 7.11 (d, 1H,  $^3J$  = 3.2 Hz, 3-H), 7.18 (ddd, 1H,  $^3J$  = 9.9 Hz,  $^3J$  = 8.3 Hz,  $^4J$  = 1.9 Hz, 4'-H), 7.33 (dd, 1H,  $^3J$  = 7.6 Hz,  $^4J$  = 1.9 Hz, 6'-H). –  $^{13}\text{C-NMR}$  (125 MHz,  $\text{CDCl}_3$ ):  $\delta$  = 51.1 (C4), 53.2 (C1), 55.3 (OMe), 72.0 (C7), 110.8 (C3'), 120.6 (C5'), 125.8 (C1'), 127.2 (C6'), 127.8 (C4'), 139.8 (C3), 142.5 (C6), 143.6 (C5), 153.3 (C2), 156.9 (C2'). – El. Anal. for  $\text{C}_{14}\text{H}_{14}\text{O} \times 0.5 \text{H}_2\text{O}$ : calc. (%): C 81.13, H 7.29, found (%): C 80.93, H 6.97.

### 2-(4-Cyanophenyl)-norbornadiene (**5g**)

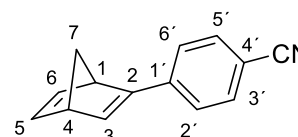

1-Iodo-4-cyanobenzene (**4g**, 178 mg, 777  $\mu\text{mol}$ ) and **2a** (187 mg, 855  $\mu\text{mol}$ ) were treated according to GP A. The crude product was purified by column chromatography (hexane/EtOAc 9:1,  $v:v$ ,  $R_f$  = 0.49) to provide **5g** as a yellow oil (10.5 mg, 54.4  $\mu\text{mol}$ , 7%), which was still contaminated with starting material and decomposition products according to  $^1\text{H-NMR}$ -spectroscopic analysis.

### 2-(2-Nitrophenyl)-norbornadiene (**5h**)

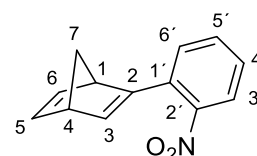

1-Bromo-2-nitrobenzene (**4h**, 142 mg, 704  $\mu\text{mol}$ ) and **2a** (169 mg, 774  $\mu\text{mol}$ ) were treated according to GP A. The crude product was purified by column chromatography (hexane/EtOAc 9:1,  $v:v$ ,  $R_f$  = 0.51) to provide **5h** as a colorless liquid (100.0 mg, 469  $\mu\text{mol}$ , 67%). –  $^1\text{H-NMR}$  (500 MHz,  $\text{CDCl}_3$ ):  $\delta$  = 2.09 (dt, 1H,  $^2J$  = 6.0 Hz,  $^3J$  = 1.4 Hz, 7-H), 2.29 (dt, 1H,  $^2J$  = 6.0 Hz,  $^3J$  = 1.5 Hz, 7-H), 3.50–3.53 (m, 1H, 1-H), 3.70–3.73 (m, 1H, 4-H), 6.77–6.80 (m, 2H, 3-H, 5-H), 6.91 (dd, 1H,  $^3J$  = 5.0 Hz,  $^3J$  = 2.9 Hz, 6-H), 7.26 (dd, 1H,  $^3J$  = 7.8 Hz,  $^4J$  = 1.4 Hz, 6'-H), 7.33–7.37 (m, 1H, 4'-H), 7.47 (td, 1H,  $^3J$  = 7.6 Hz,  $^4J$  = 1.3 Hz, 5'-H), 7.79 (dd, 1H,  $^3J$  = 8.1 Hz,  $^4J$  = 1.3 Hz, 3'-H). –  $^{13}\text{C-NMR}$  (125 MHz,  $\text{CDCl}_3$ ):  $\delta$  = 50.9 (C4), 54.5 (C1), 73.5 (C7), 124.1 (C3'), 127.7 (C4'), 129.9 (C6'), 132.5 (C1'), 132.9 (C5'), 140.6 (C3), 142.3 (C5), 142.9 (C6), 147.7 (C2), 154.0 (C2'). – El. Anal. for  $\text{C}_{14}\text{H}_{14}\text{NO}_2 \times 0.5 \text{H}_2\text{O}$ : calc. (%): C 70.26, H 5.44, N 6.30, found (%): C 70.74, H 5.29, N 6.07.

2-(2-Methoxy-5-cyanophenyl)-norbornadiene (**5i**)

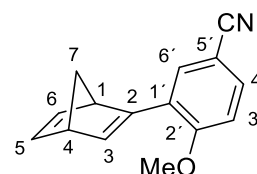

3-Iodo-4-methoxybenzonitrile (**4i**, 174 mg, 673  $\mu\text{mol}$ ) and **2a** (161 mg, 740  $\mu\text{mol}$ ) were treated according to GP A. The crude product was purified by column chromatography (hexane/EtOAc 8:2, *v.v.*,  $R_f = 0.40$ ) to provide **5i** as a yellow liquid (86.4 mg, 387  $\mu\text{mol}$ , 58%). –  $^1\text{H-NMR}$  (500 MHz,  $\text{CDCl}_3$ ):  $\delta = 2.08$  (dt, 1H,  $^2J = 6.1$  Hz,  $^3J = 1.5$  Hz, 7-H), 2.12 (dt, 1H,  $^2J = 6.1$  Hz,  $^3J = 1.5$  Hz, 7-H), 3.72–3.75 (m, 1H, 4-H), 3.92 (br. s, 4H, 1-H, OMe), 6.80 (dd, 1H,  $^3J = 5.1$  Hz,  $^3J = 3.2$  Hz, 5-H), 6.89–6.93 (m, 2H, 6-H, 3'H), 7.21 (d, 1H,  $^3J = 3.3$ , 3-H), 7.48 (dd, 1H,  $^3J = 8.5$  Hz,  $^4J = 2.2$  Hz, 4'-H), 7.59 (d, 1H,  $^4J = 2.2$  Hz, 6'-H). –  $^{13}\text{C-NMR}$  (125 MHz,  $\text{CDCl}_3$ ):  $\delta = 51.3$  (C4), 53.0 (C1), 55.7 (OMe), 72.2 (C7), 104.1 (C5'), 111.2 (C3'), 119.6 (C2'), 127.1 (CN), 130.8 (C6'), 132.0 (C3'), 142.3 (C6), 142.9 (C3), 143.6 (C5), 151.5 (C1), 160.2 (C1'). – EI. Anal. for  $\text{C}_{15}\text{H}_{13}\text{NO}_2 \times 0.5 \text{H}_2\text{O}$ : calc. (%): C 77.56, H 6.08, N 6.03 found (%): C 77.59, H 5.66, N 5.94.

2-(2-Pyridyl)-norbornadiene (**5j**)

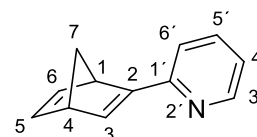

2-Bromopyridine (**4j**, 140 mg, 888  $\mu\text{mol}$ , 86.4  $\mu\text{L}$ ) and **2a** (213 mg, 977  $\mu\text{mol}$ ) were treated according to GP A. The crude product was purified by column chromatography (hexane/EtOAc 9:1, *v.v.*,  $R_f = 0.41$ ) to provide **5j** as a brown liquid (67.3 mg, 398  $\mu\text{mol}$ , 45%). –  $^1\text{H-NMR}$  (500 MHz,  $\text{CDCl}_3$ ):  $\delta = 2.15$  (dt, 1H,  $^2J = 6.2$  Hz,  $^3J = 1.6$  Hz, 7-H), 2.19 (dt, 1H,  $^2J = 6.2$  Hz,  $^3J = 1.6$  Hz, 7-H), 3.74–3.78 (m, 1H, 4-H), 4.19–4.22 (m, 1H, 1-H), 6.80 (dd, 1H,  $^3J = 5.0$  Hz,  $^3J = 2.9$  Hz, 5-H), 6.96 (dd, 1H,  $^3J = 5.0$  Hz,  $^4J = 2.9$  Hz, 6-H), 7.06–7.10 (m, 1H, 4'H), 7.28–7.31 (m, 1H, 3-H), 7.39 (ddd, 1H,  $^3J = 8.0$  Hz,  $^4J = 2.0$  Hz,  $^5J = 1.1$  Hz, 6'-H), 7.60 (tt, 1H,  $^3J = 8.0$  Hz,  $^4J = 2.0$  Hz, 5'-H), 8.55–8.58 (m, 1H, 3'-H). –  $^{13}\text{C-NMR}$  (125 MHz,  $\text{CDCl}_3$ ):  $\delta = 50.8$  (C1), 51.4 (C4), 72.9 (C7), 119.9 (C6'), 121.6 (C4'), 136.2 (C5'), 141.8 (C3), 142.9 (C6), 143.2 (C5), 149.5 (C3'), 154.6 (C1'), 157.6 (C2).

(4-Methoxyphenyl)-3-methyl-norbornadiene (**5k**)

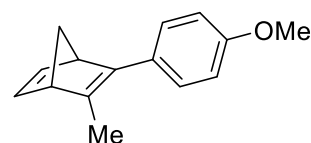

1. 4-Iodoanisole (**4k**, 55.7 mg, 238  $\mu\text{mol}$ ) and **2a** (50.0 mg, 216  $\mu\text{mol}$ ) were treated according to GP A. The  $^1\text{H}$  NMR-spectroscopic analysis of the reaction mixture showed only the signals of the starting materials with no signs of new products.

2. 4-Iodoanisole (**4k**, 67.0 mg, 285  $\mu\text{mol}$ ) and **2a** (67.0 mg, 285  $\mu\text{mol}$ ) were treated according to GP B. The  $^1\text{H}$  NMR-spectroscopic analysis of the reaction mixture showed only the signals of the starting materials with no signs of new products.



### *Bicyclo[2.2.1]heptadien-2-yl-boronic acid*

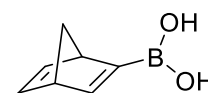

#### *Attempt 1*

A mixture suspension of *4,4,5,5-tetramethyl-2-(bicyclo-[2.2.1]heptadien-2-yl)-1,3,2-dioxaborolane (2a)*, 100 mg, 459  $\mu\text{mol}$ ) and  $\text{NaIO}_4$  (295 mg, 1.38 mmol) in THF/water (4:1, v.v, 4.0 mL) was stirred for 30 min at rt. An aqueous solution of HCl (1 M, 321  $\mu\text{mol}$ , 321  $\mu\text{L}$ ) was added to the suspension, which immediately turned black. The TLC analysis showed that the substrate decomposed.

#### *Attempt 2*

A suspension of *potassium bicyclo[2.2.1]heptadien-2-yl-trifluoroborate (3)*, 80.0 mg, 404  $\mu\text{mol}$ ) and LiOH (33.9 mg, 1.41 mmol) in water (2.0 mL) and MeCN (4.0 mL) was stirred for 20 h at rt. An aqueous solution of  $\text{NH}_4\text{Cl}$  (3.5 mL) was added followed by the addition of aq. HCl (1 M, 1 mL), which resulted in a black solution. The TLC analysis showed that the substrate decomposed.

## 1.5 Photoreactions

Starting from a stock solution in  $\text{CHCl}_3$ , a solution of **5b** in MeCN ( $c = 20 \mu\text{M}$ ) was prepared. The experiments were performed with a sample volume of 2000  $\mu\text{L}$ . An absorption spectrum of **5b** was recorded in the range of 200 nm to 370 nm. Subsequently, the sample was irradiated at  $\lambda_{\text{ex}} = 315 \text{ nm}$ . The photoreaction was monitored photometrically until no further changes in the spectra occurred. The thermal backconversion of **6b** into **5b** was investigated at 60  $^\circ\text{C}$ , monitored by the increase of the norbornadiene absorbance at 301 nm. The spectra were processed with the software Origin with the implemented smoothing function "adjacent-averaging" with a factor of 10 [4].

## 2 NMR spectra

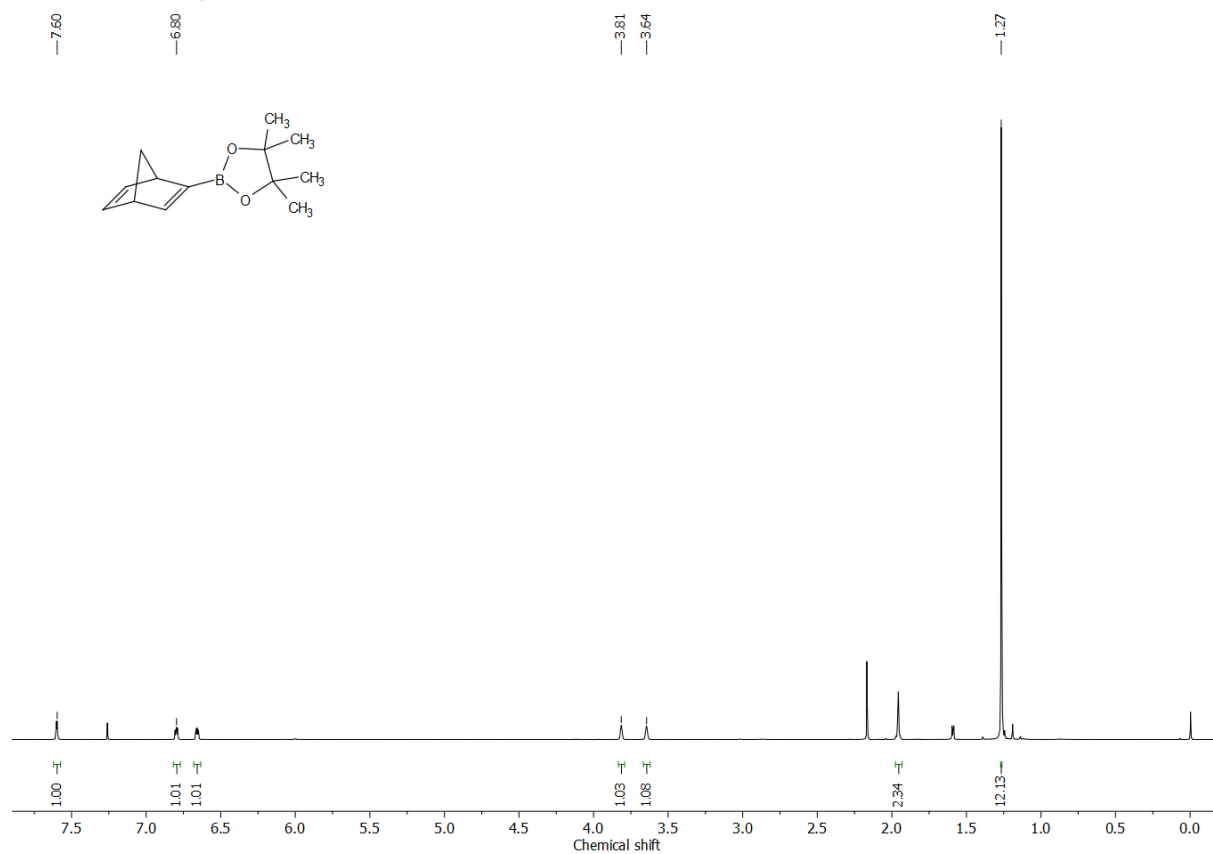

Figure S1:  $^1\text{H}$  NMR spectrum of **2a** (500 MHz) in  $\text{CDCl}_3$ .

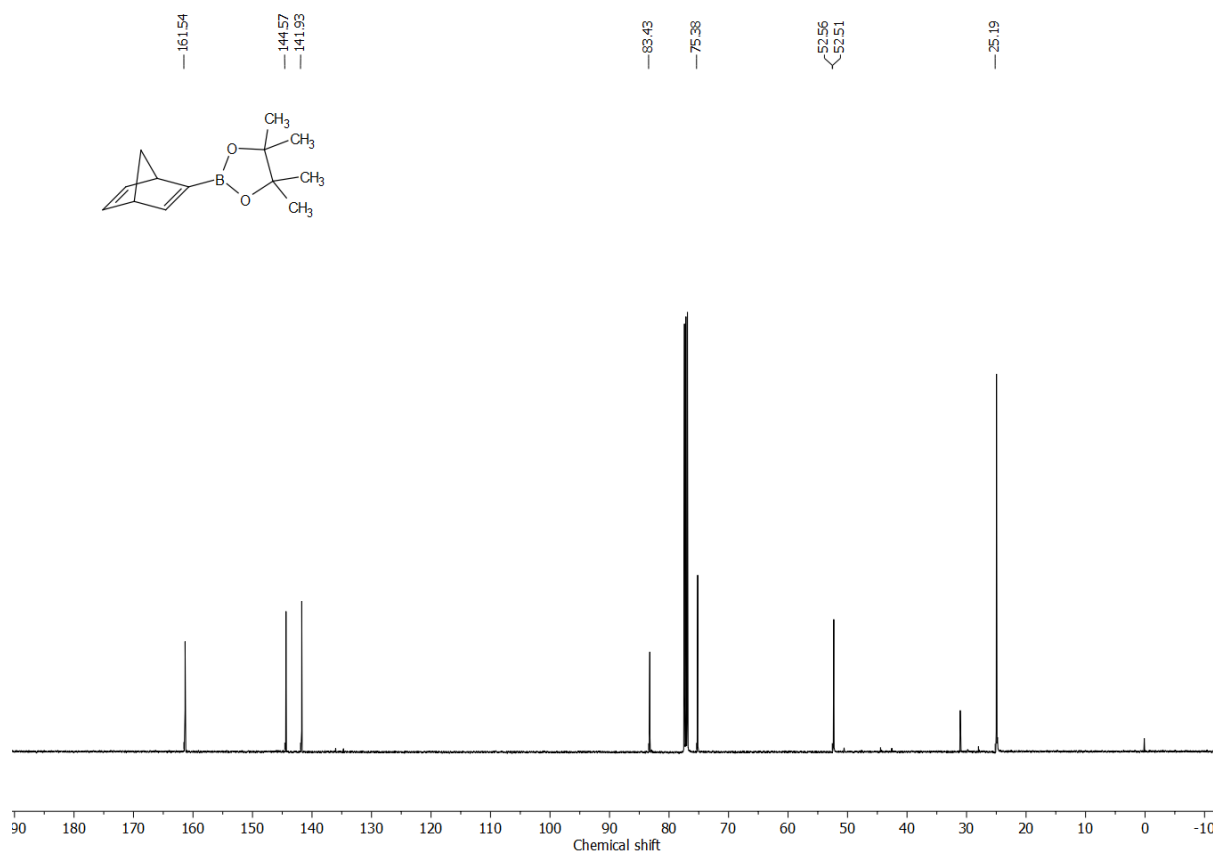

Figure S2:  $^{13}\text{C}$  NMR spectrum of **2a** (125 MHz) in  $\text{CDCl}_3$ .

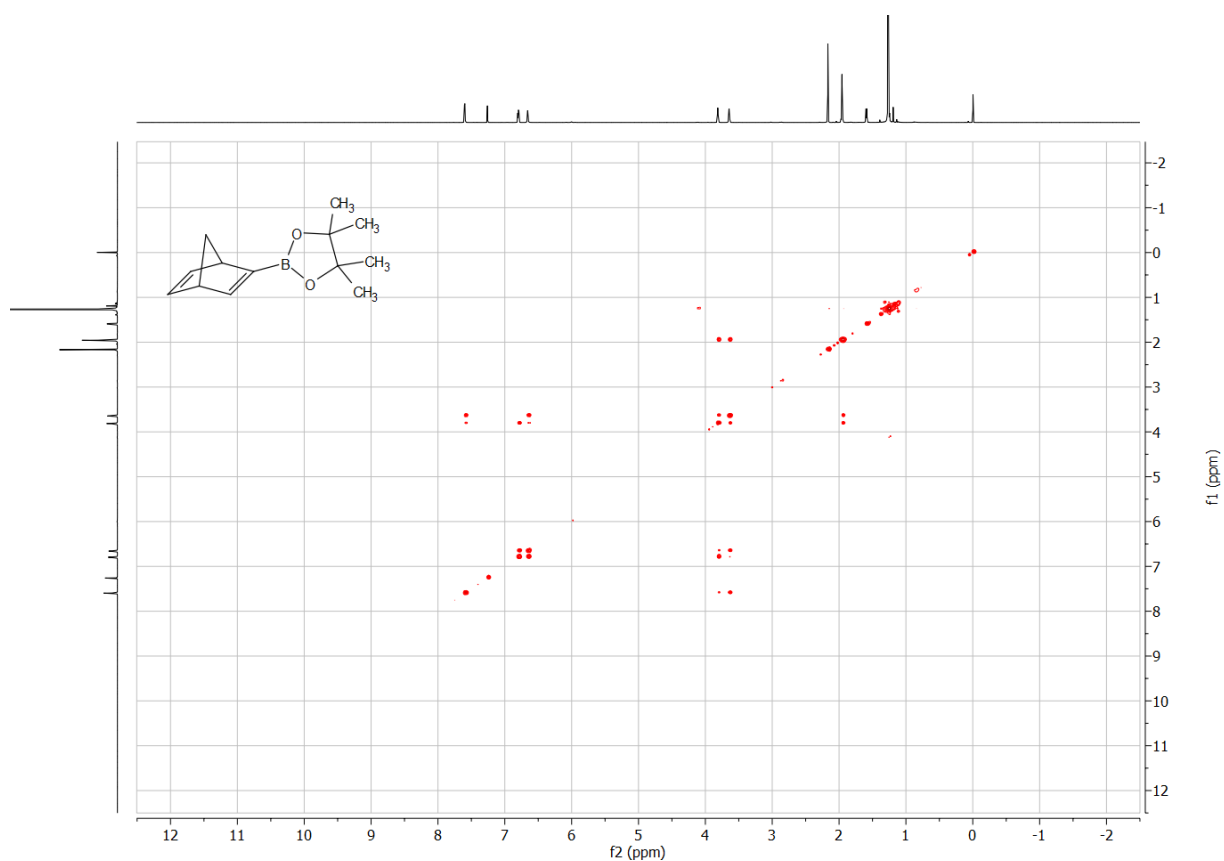

**Figure S3:** H,H-COSY-NMR spectrum of **2a** (500 MHz, 500 MHz) in  $\text{CDCl}_3$ .

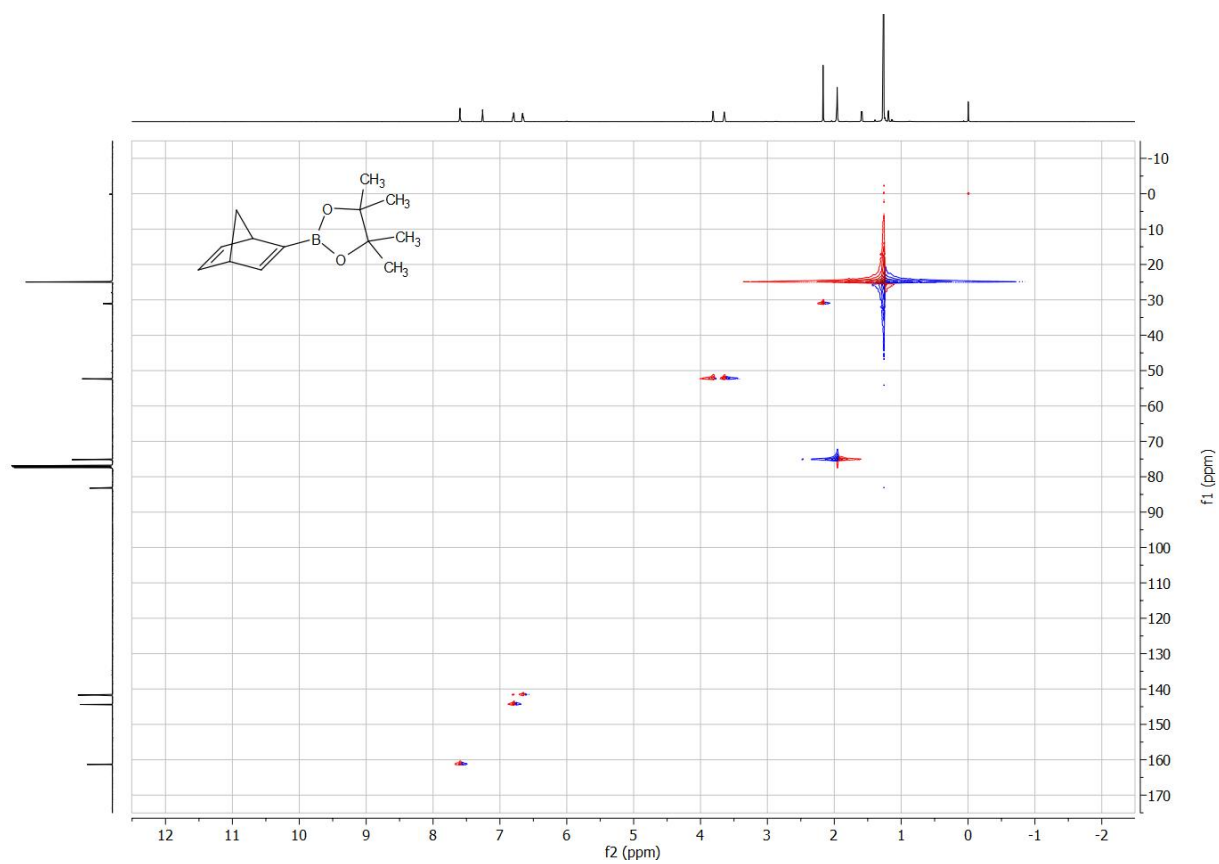

**Figure S4:** HSQC-NMR spectrum of **2a** (500 MHz, 125 MHz) in  $\text{CDCl}_3$ .

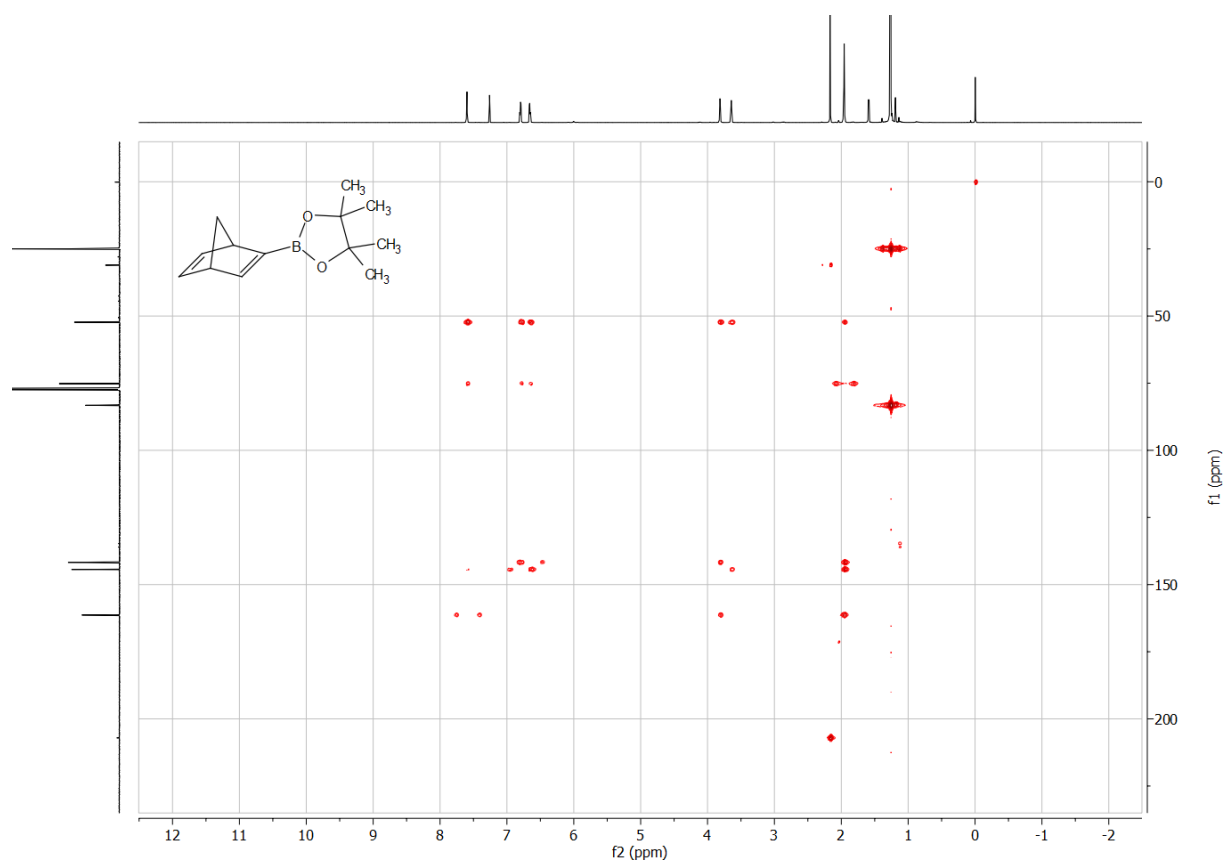

**Figure S5:** HMBC-NMR spectrum of **2a** (500 MHz, 125 MHz) in CDCl<sub>3</sub>.

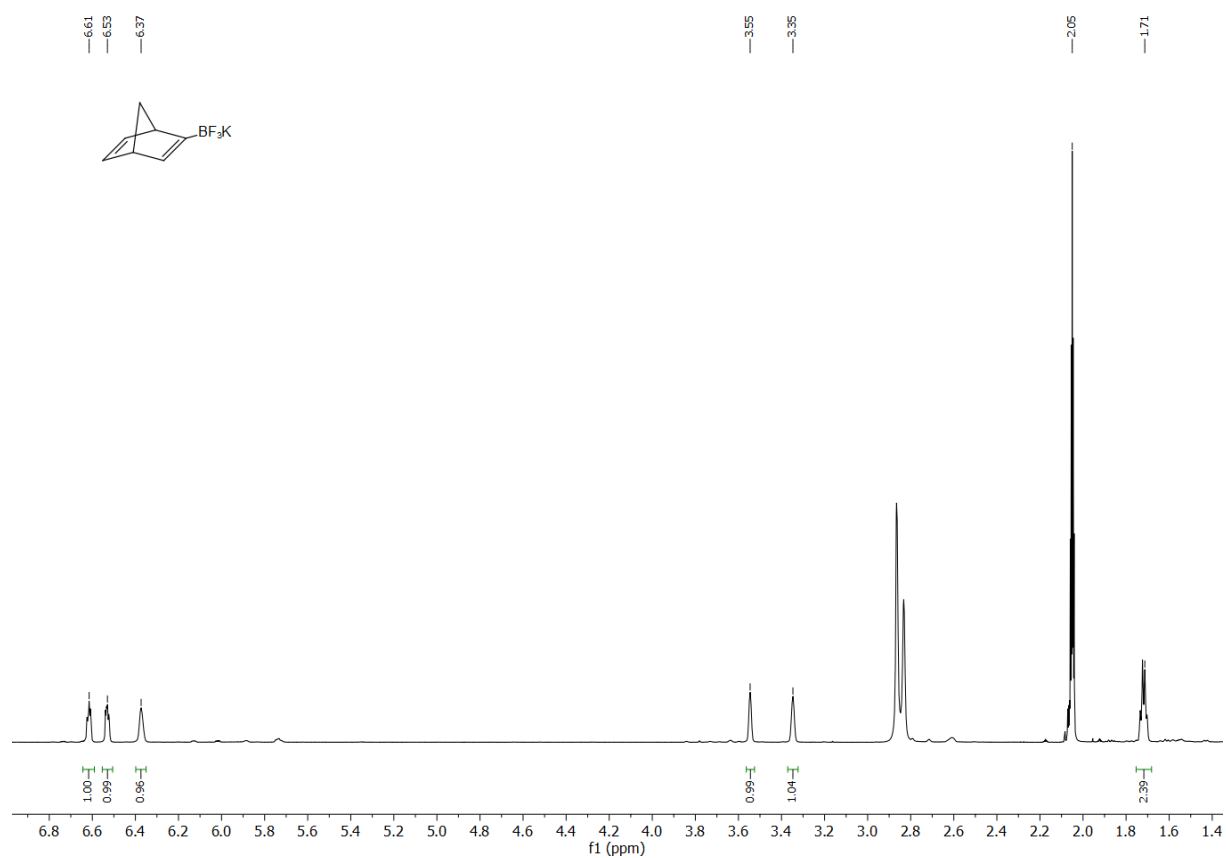

**Figure S6:** <sup>1</sup>H NMR spectrum of **3** (500 MHz) in CDCl<sub>3</sub>.

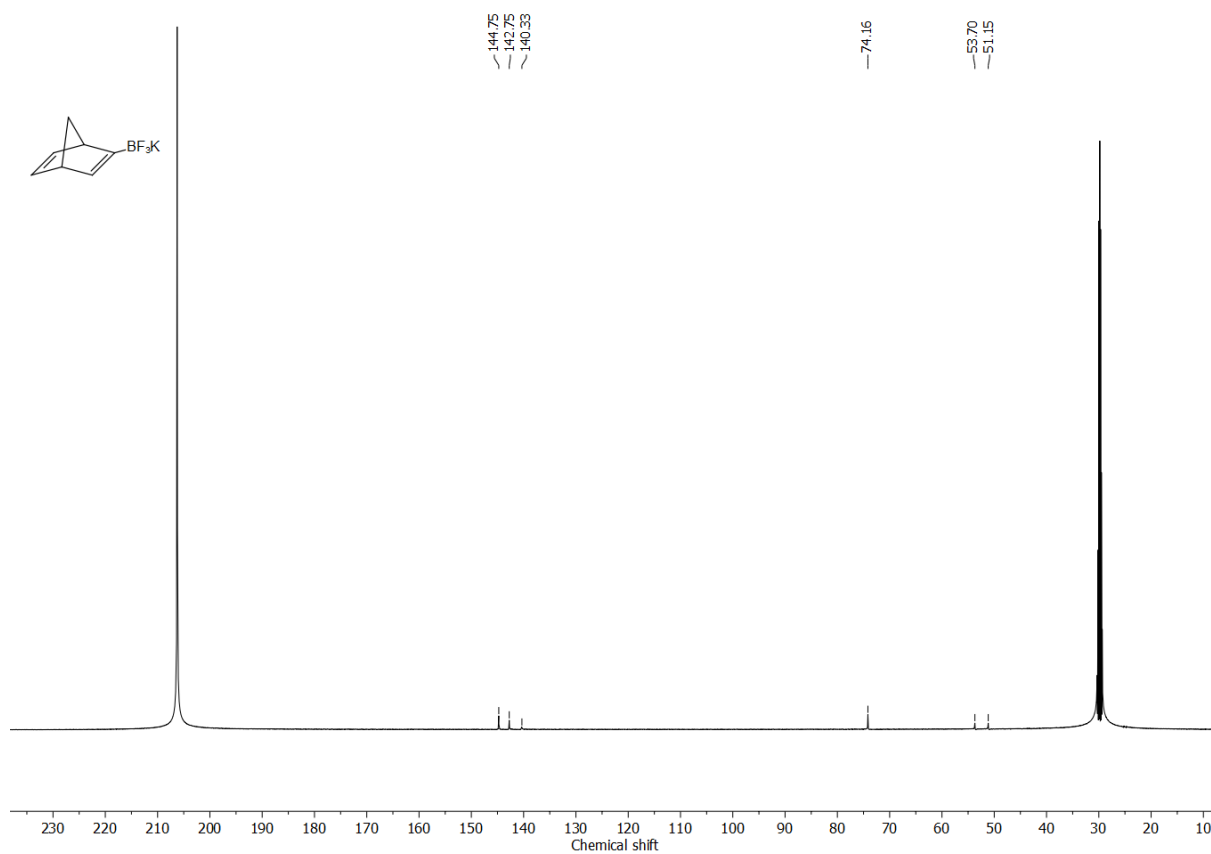

**Figure S7:**  $^{13}\text{C}$  NMR spectrum of **3** (125 MHz) in  $\text{CDCl}_3$ .

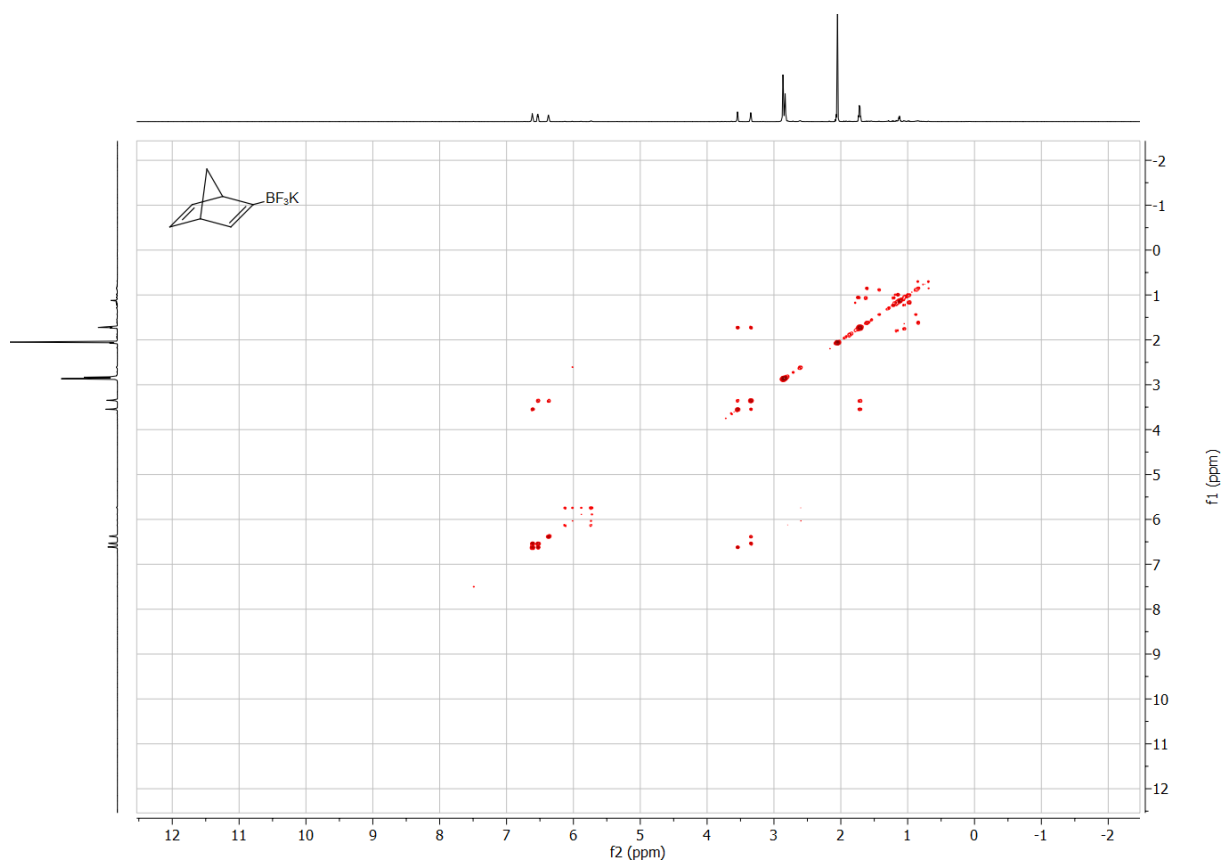

**Figure S8:** H,H-COSY-NMR spectrum of **3** (500 MHz, 500 MHz) in  $\text{CDCl}_3$ .

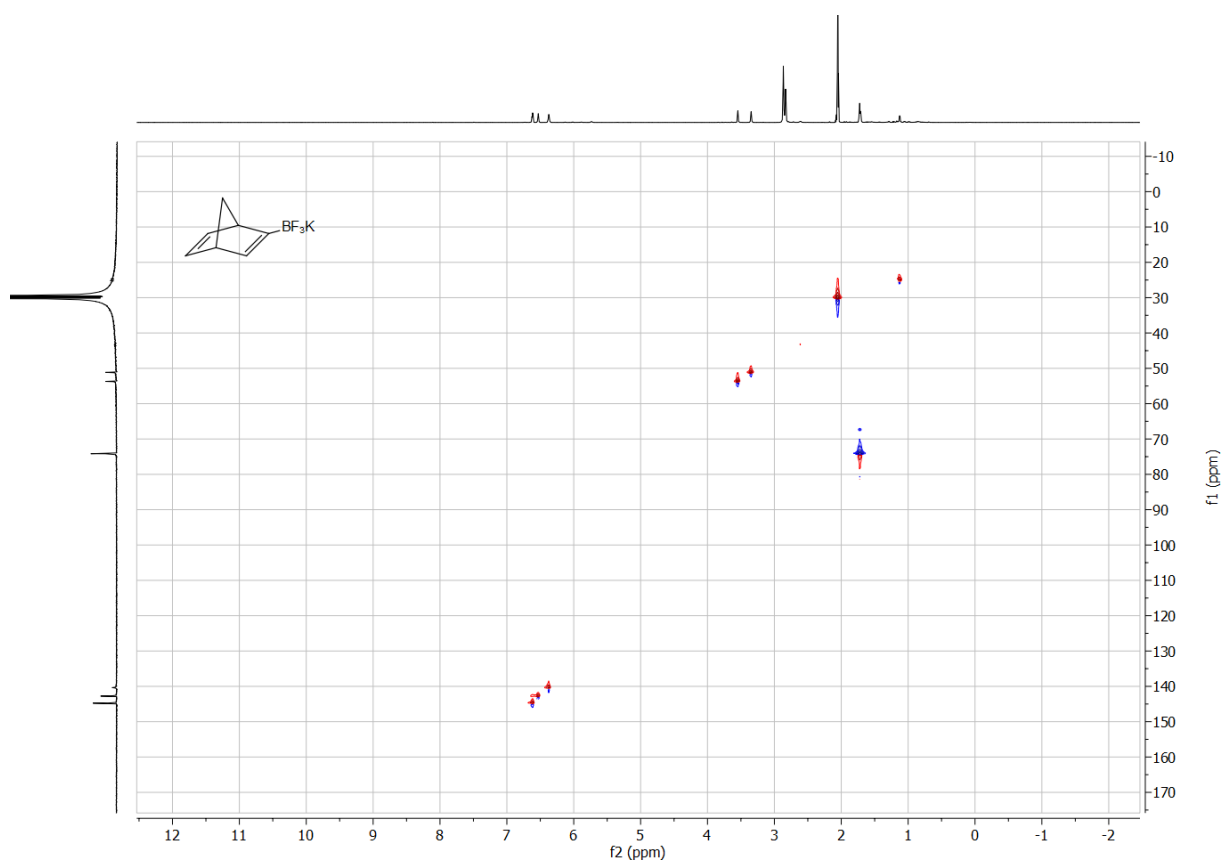

Figure S9: HSQC-NMR spectrum of **3** (500 MHz, 125 MHz) in CDCl<sub>3</sub>.

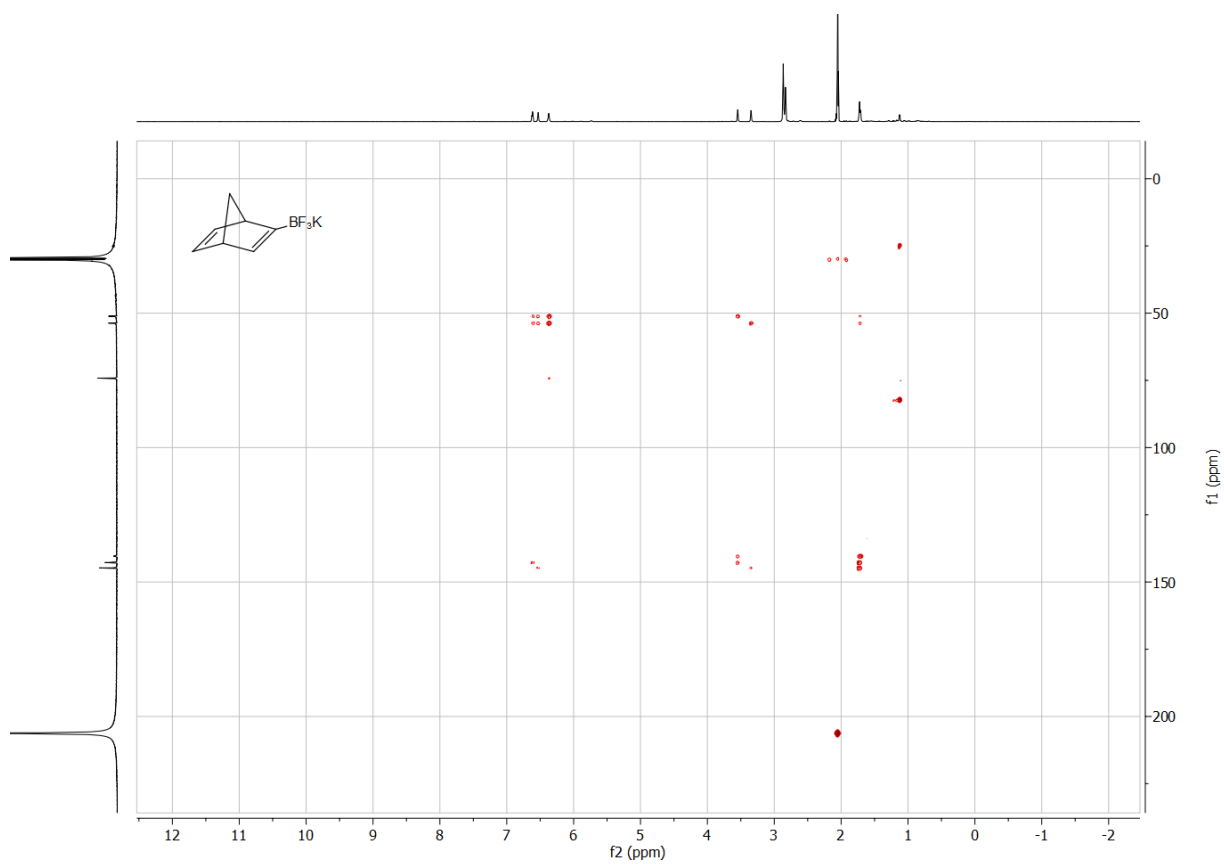

Figure S10: HMBC-NMR spectrum of **3** (500 MHz, 125 MHz) in CDCl<sub>3</sub>.

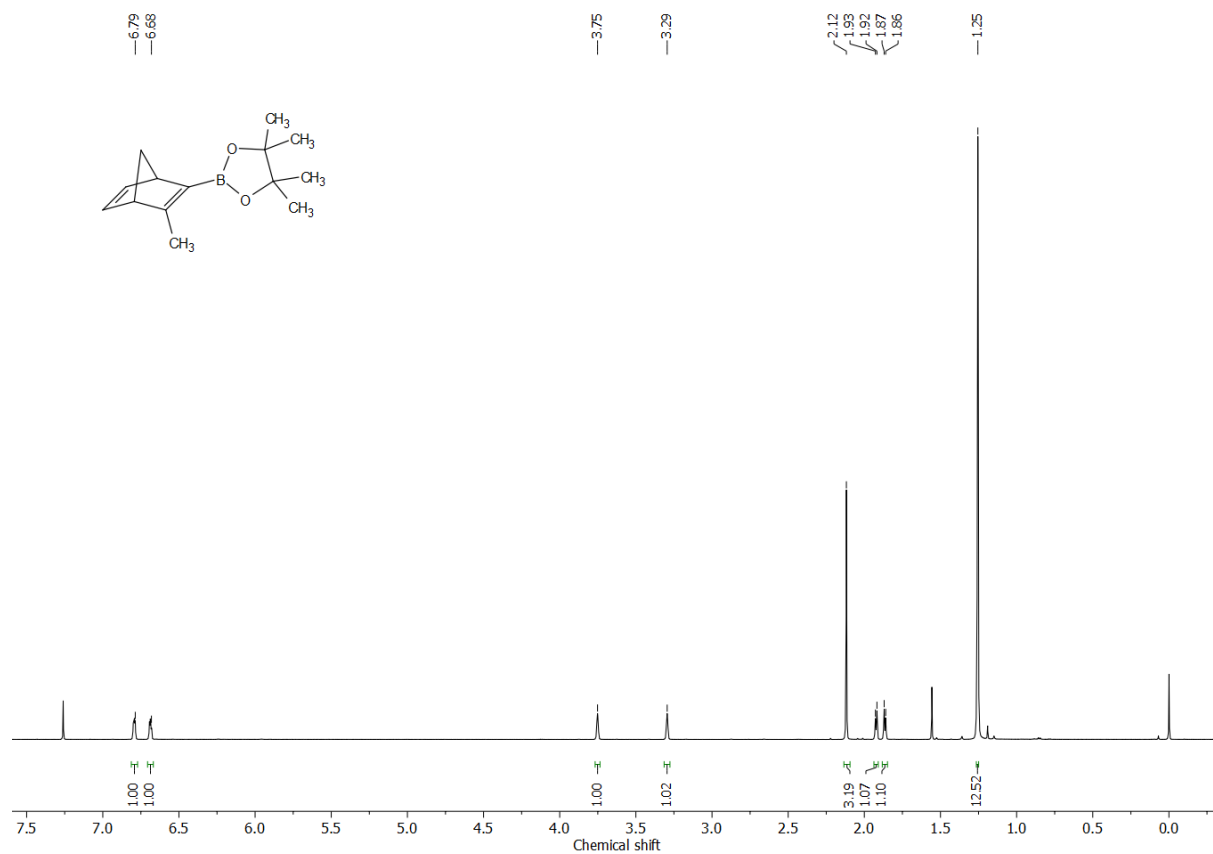

**Figure S11:** <sup>1</sup>H NMR spectrum of **2b** (600 MHz) in CDCl<sub>3</sub>.

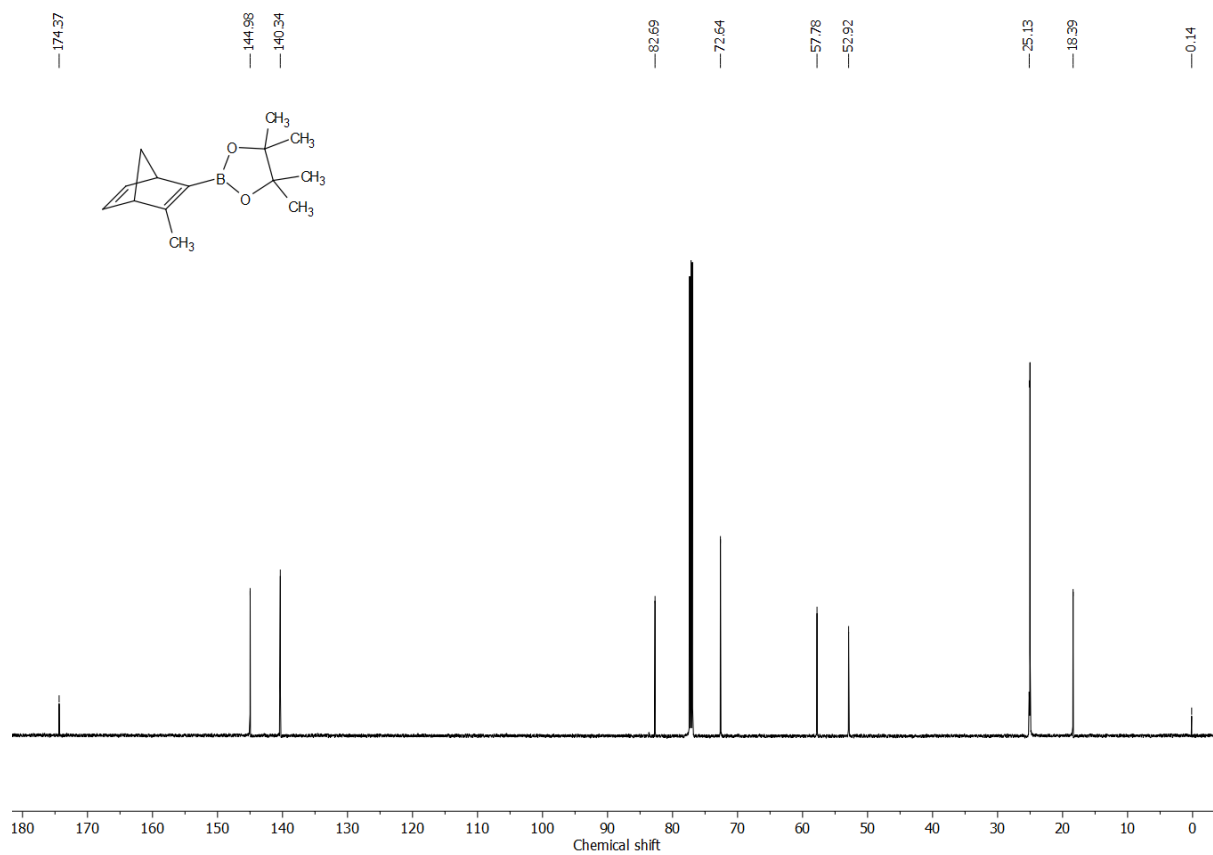

**Figure S12:** <sup>13</sup>C NMR spectrum of **2b** (150 MHz) in CDCl<sub>3</sub>.

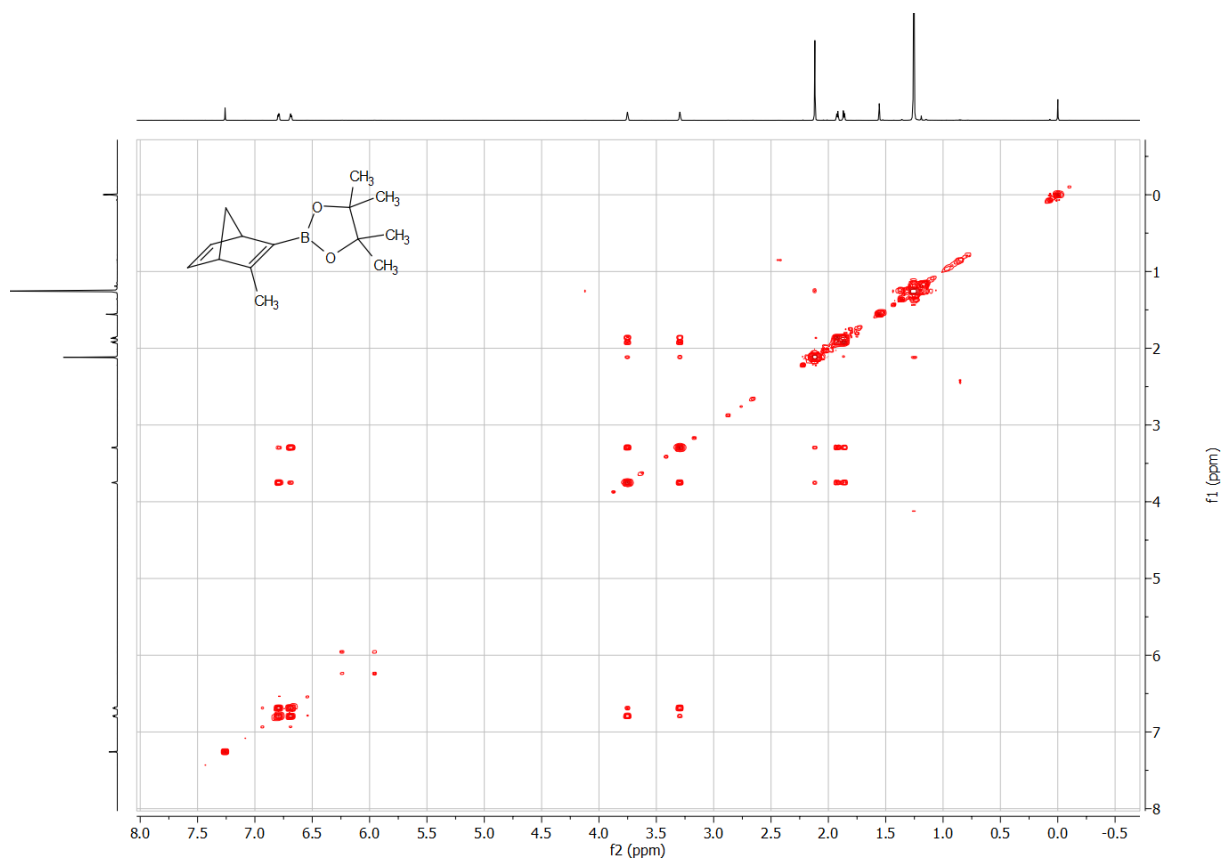

**Figure S13:** H,H-COSY-NMR spectrum of **2b** (600 MHz, 600 MHz) in CDCl<sub>3</sub>.

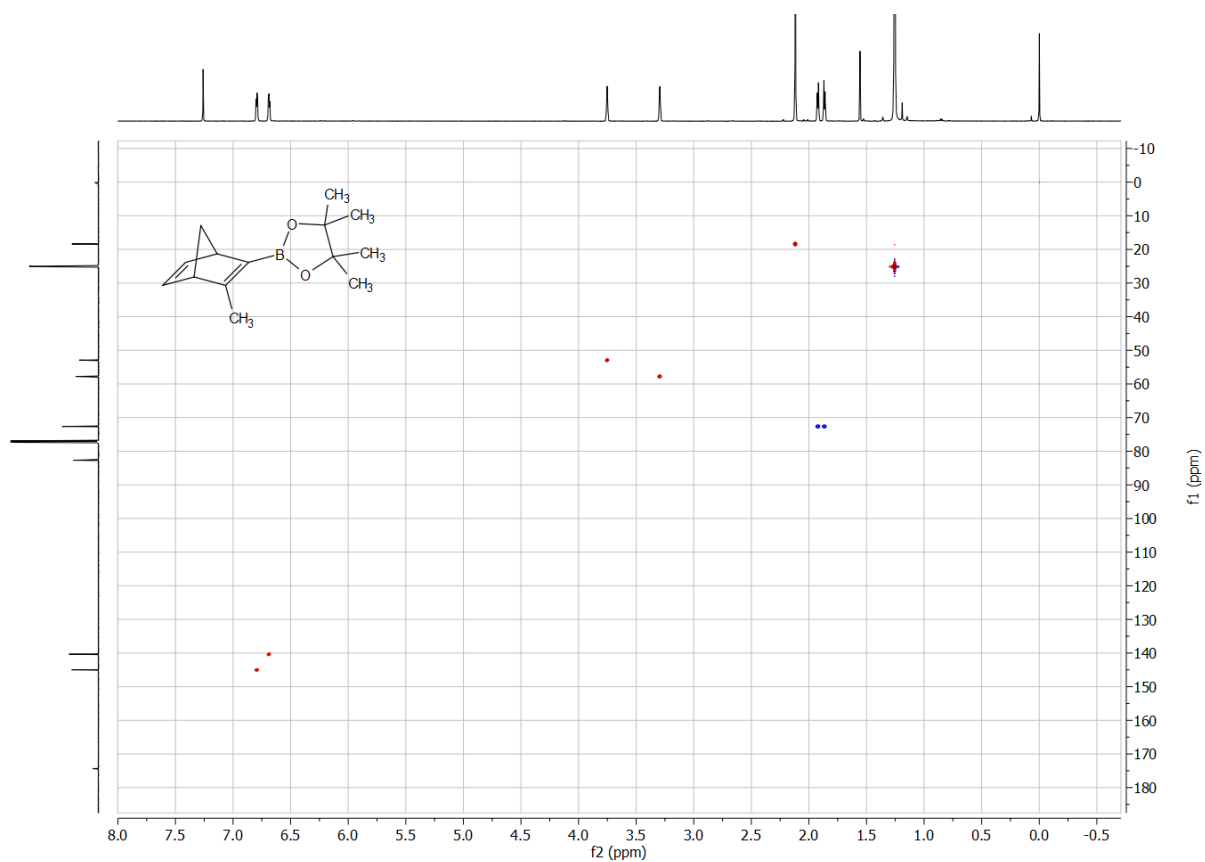

**Figure S14:** HSQC-NMR spectrum of **2b** (500 MHz, 150 MHz) in CDCl<sub>3</sub>.



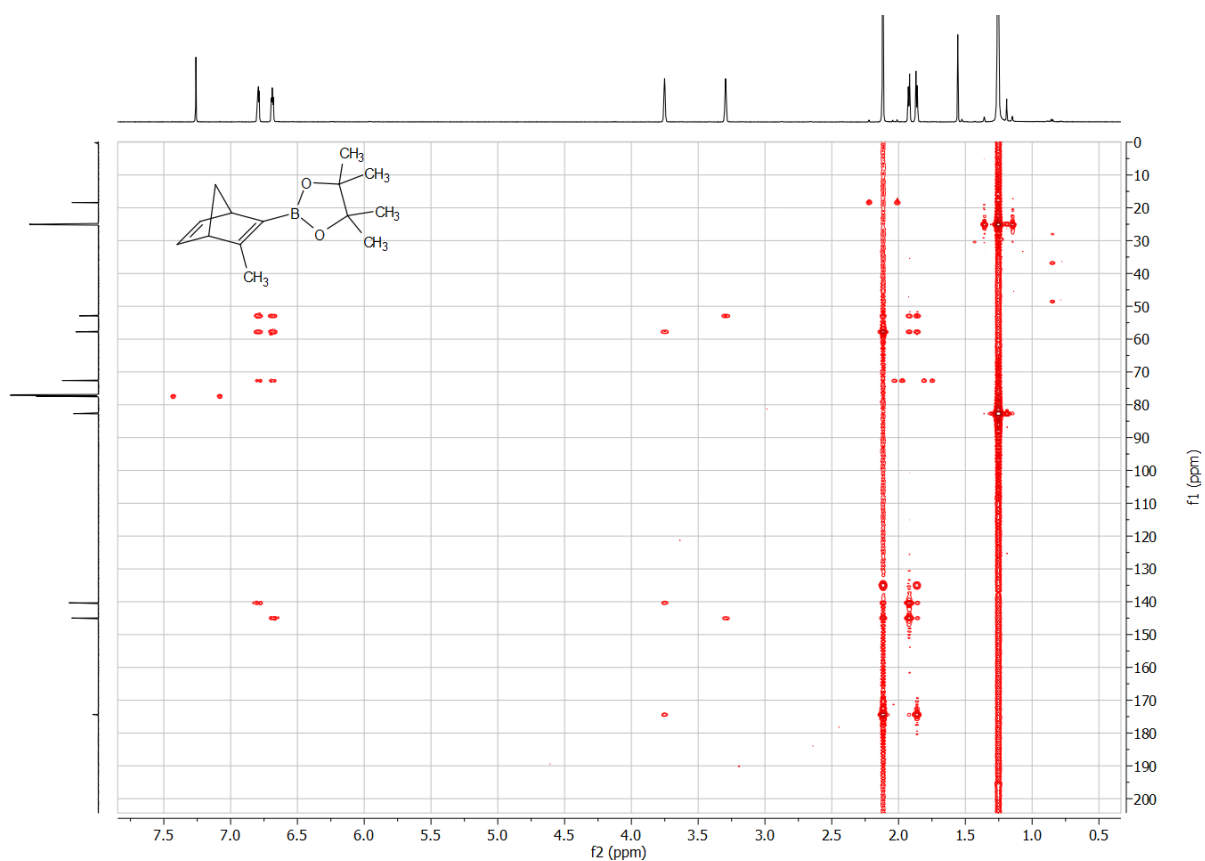

**Figure S15:** HMBC-NMR spectrum of **2b** (600 MHz, 150 MHz) in  $\text{CDCl}_3$ .

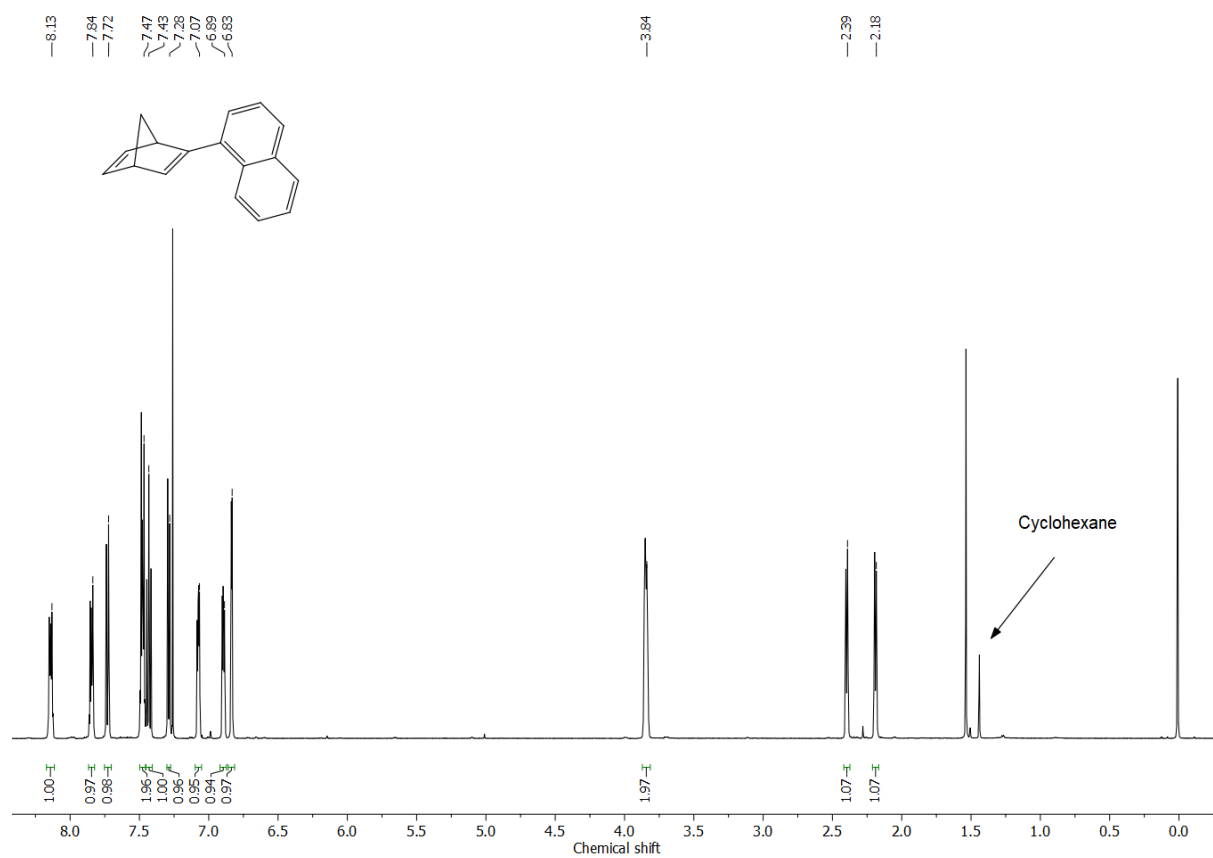

**Figure S16:**  $^1\text{H}$  NMR spectrum of **5b** (500 MHz) in  $\text{CDCl}_3$ .

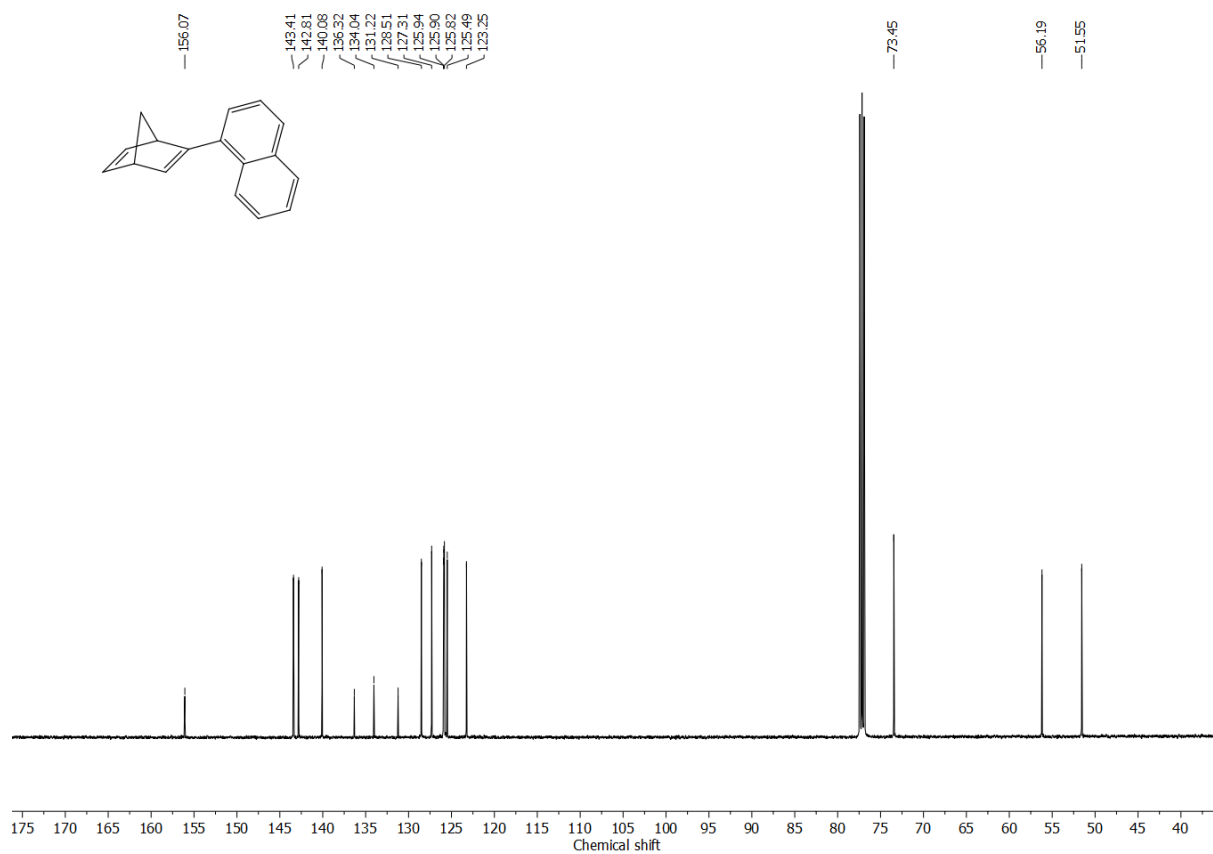

**Figure S17:** <sup>13</sup>C NMR spectrum of **5b** (125 MHz) in CDCl<sub>3</sub>.

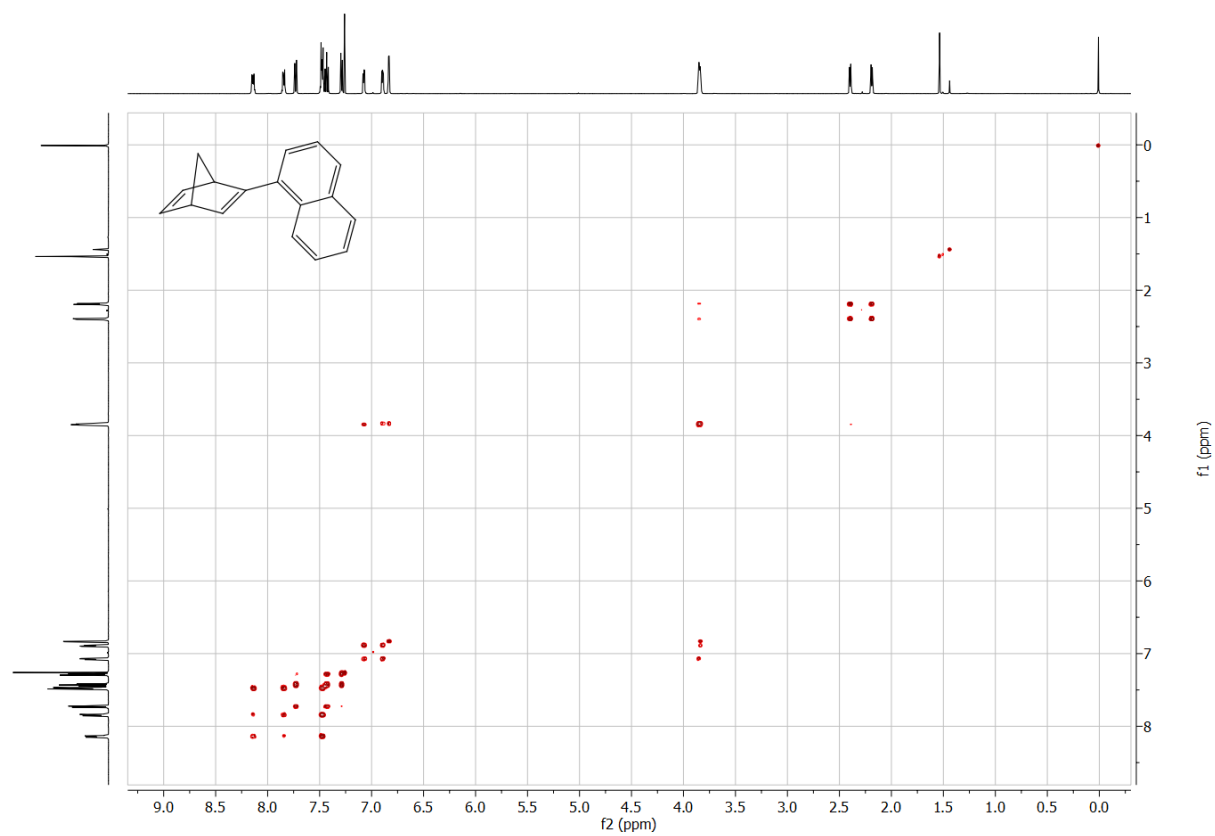

**Figure S18:** H,H-COSY-NMR spectrum of **5b** (500 MHz, 500 MHz) in CDCl<sub>3</sub>.

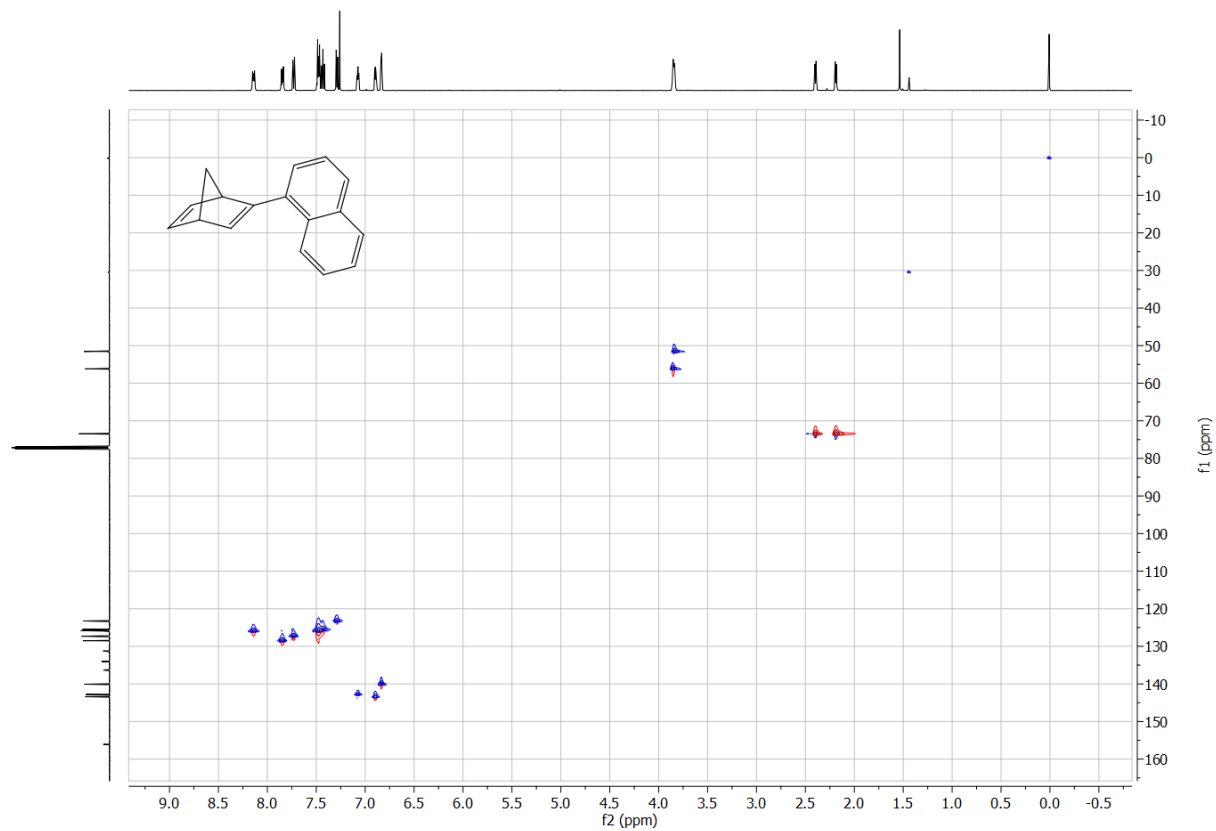

Figure S19: HSQC-NMR spectrum of **5b** (500 MHz, 125 MHz) in CDCl<sub>3</sub>.

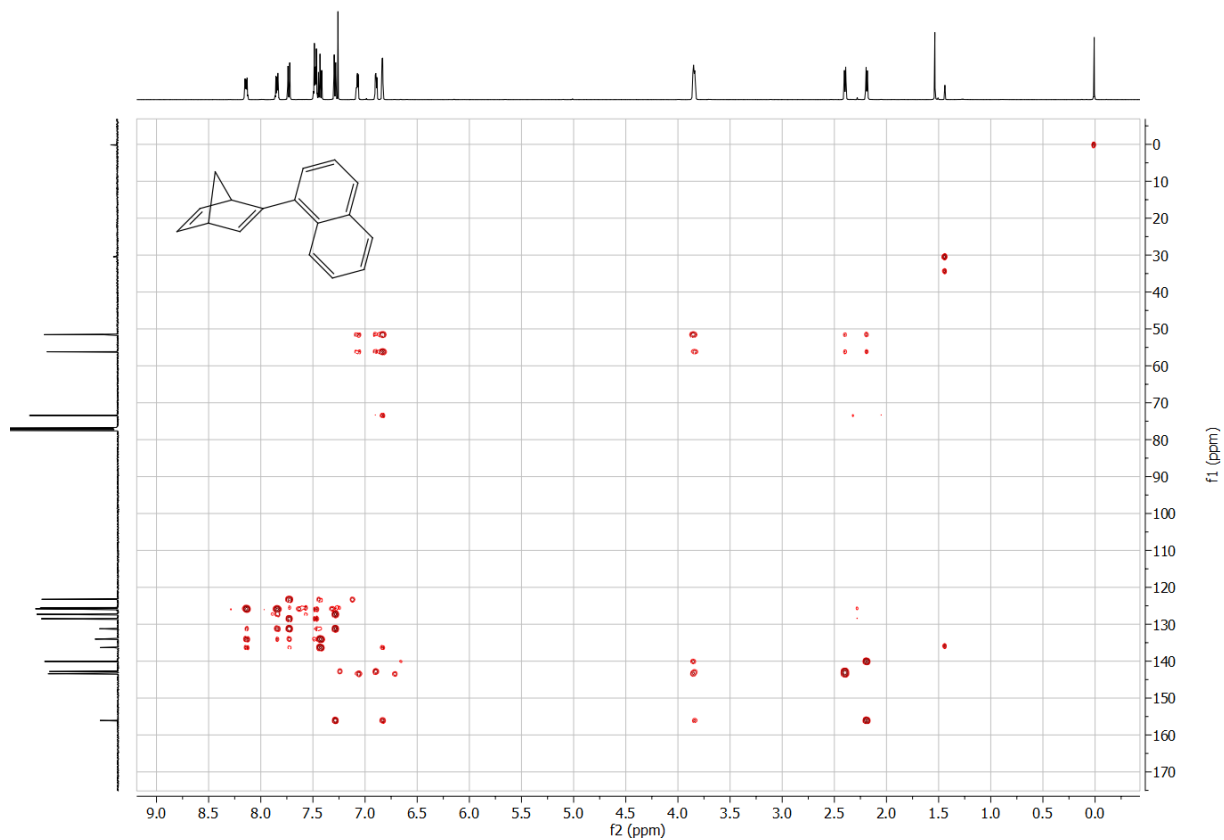

Figure S20: HMBC-NMR spectrum of **5b** (500 MHz, 125 MHz) in CDCl<sub>3</sub>.

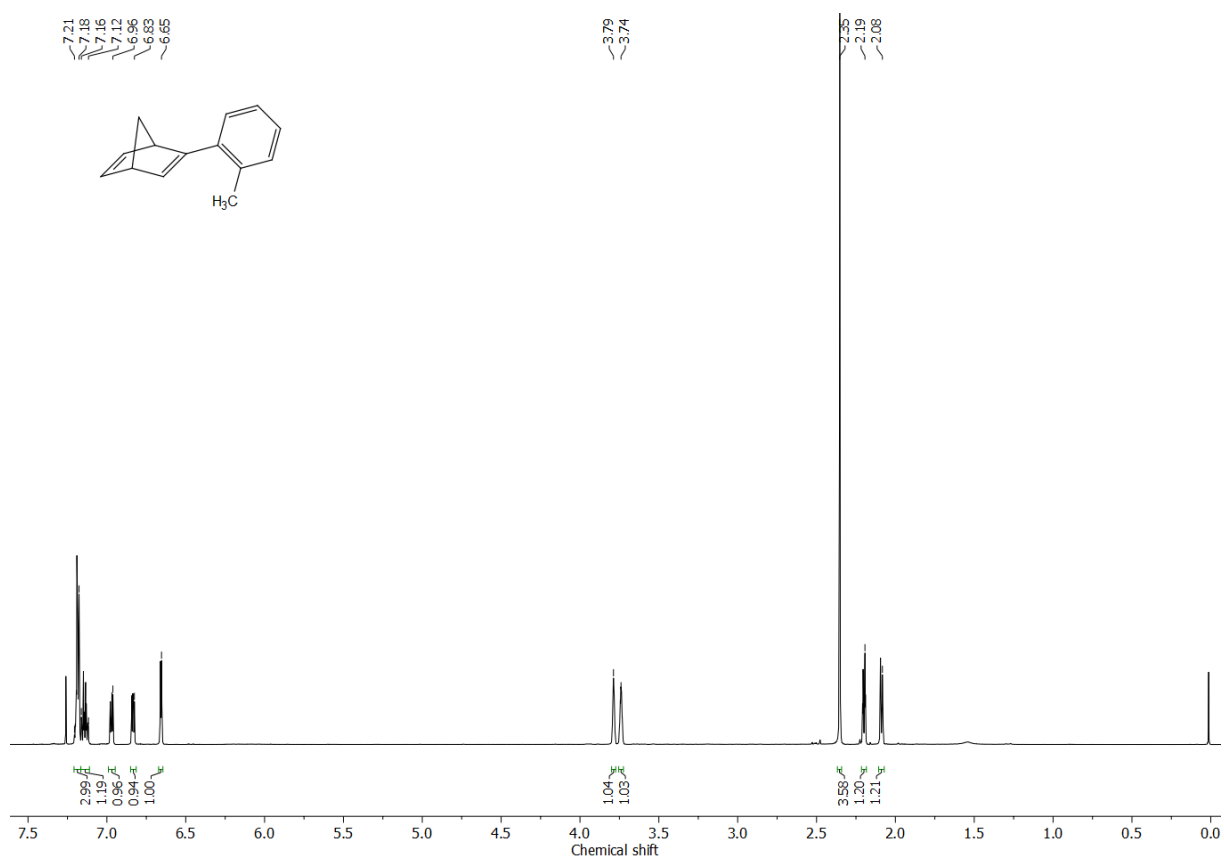

**Figure S21:** <sup>1</sup>H NMR spectrum of **5c** (500 MHz) in CDCl<sub>3</sub>.

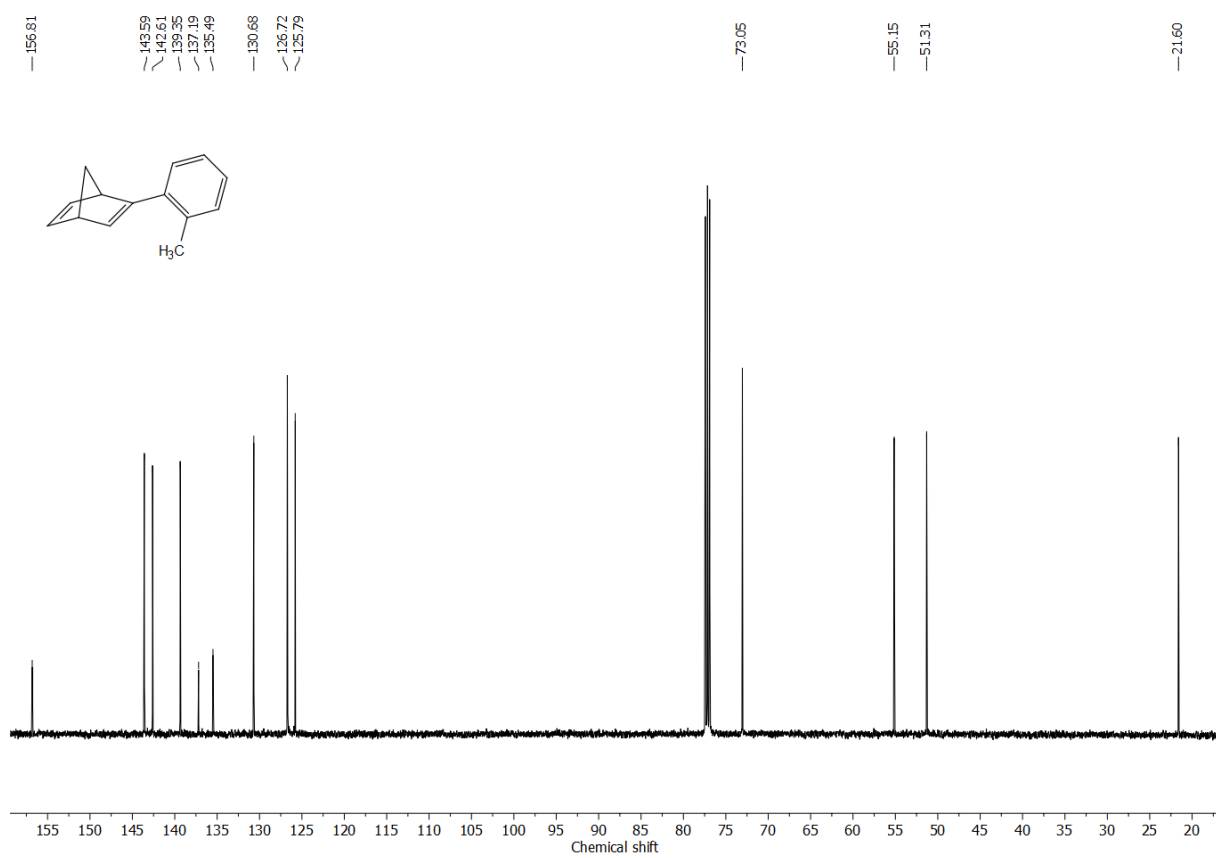

**Figure S22:** <sup>13</sup>C NMR spectrum of **5c** (125 MHz) in CDCl<sub>3</sub>.

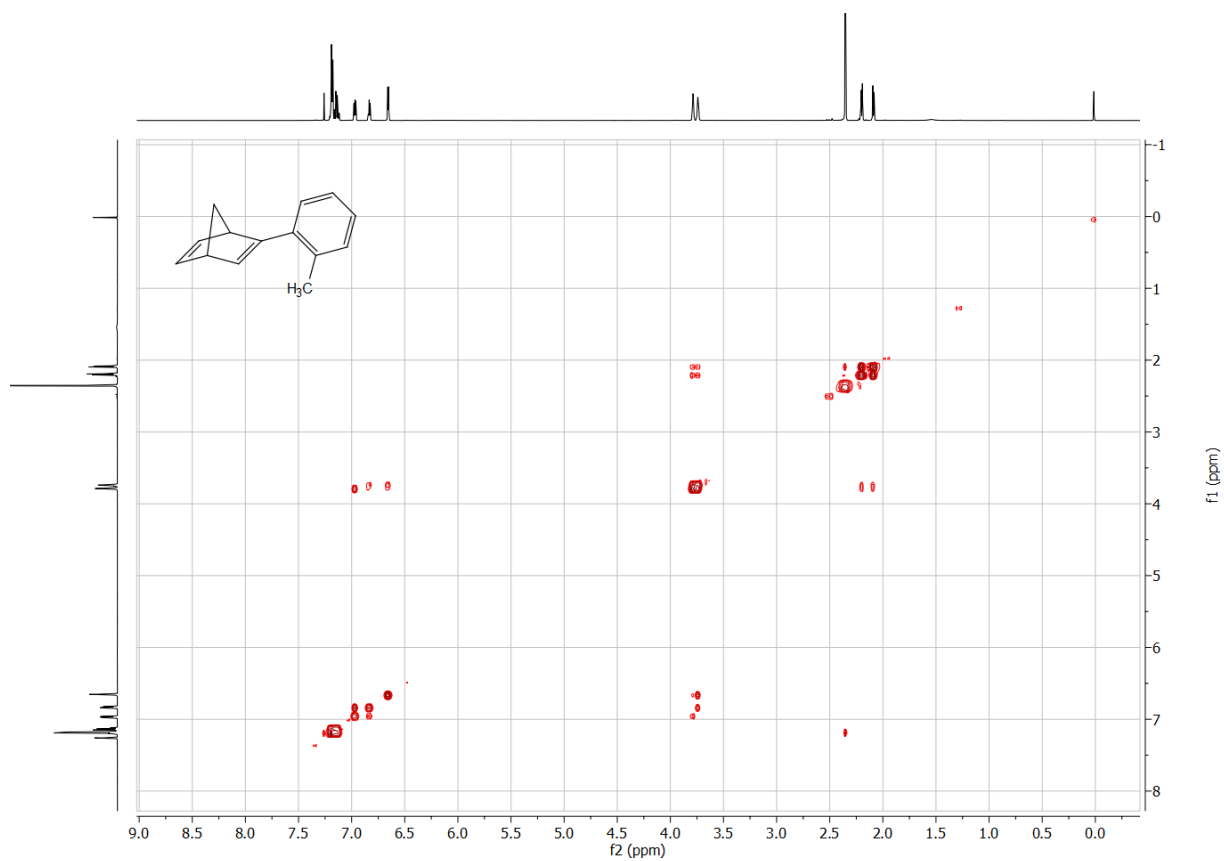

**Figure S23:** H,H-COSY-NMR spectrum of **5c** (500 MHz, 500 MHz) in  $\text{CDCl}_3$ .

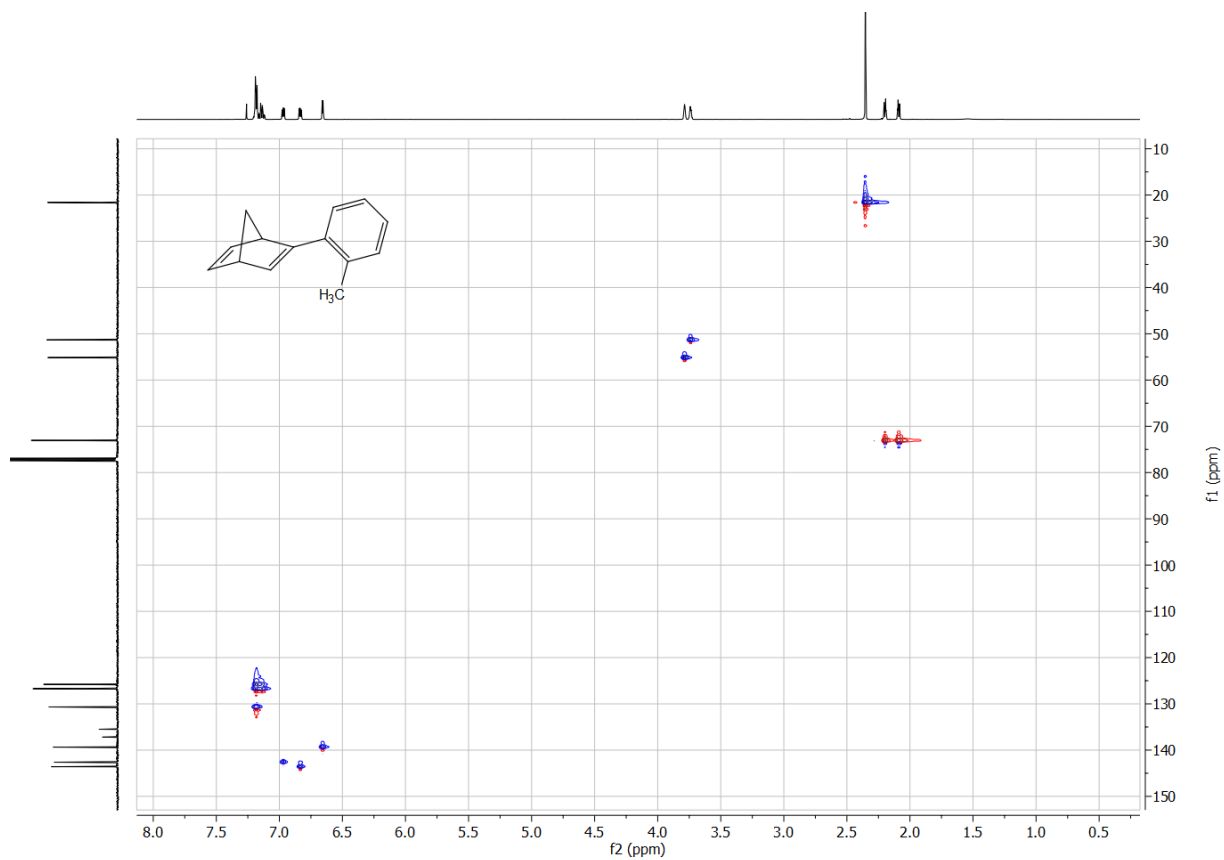

**Figure S24:** HSQC-NMR spectrum of **5c** (500 MHz, 125 MHz) in  $\text{CDCl}_3$ .

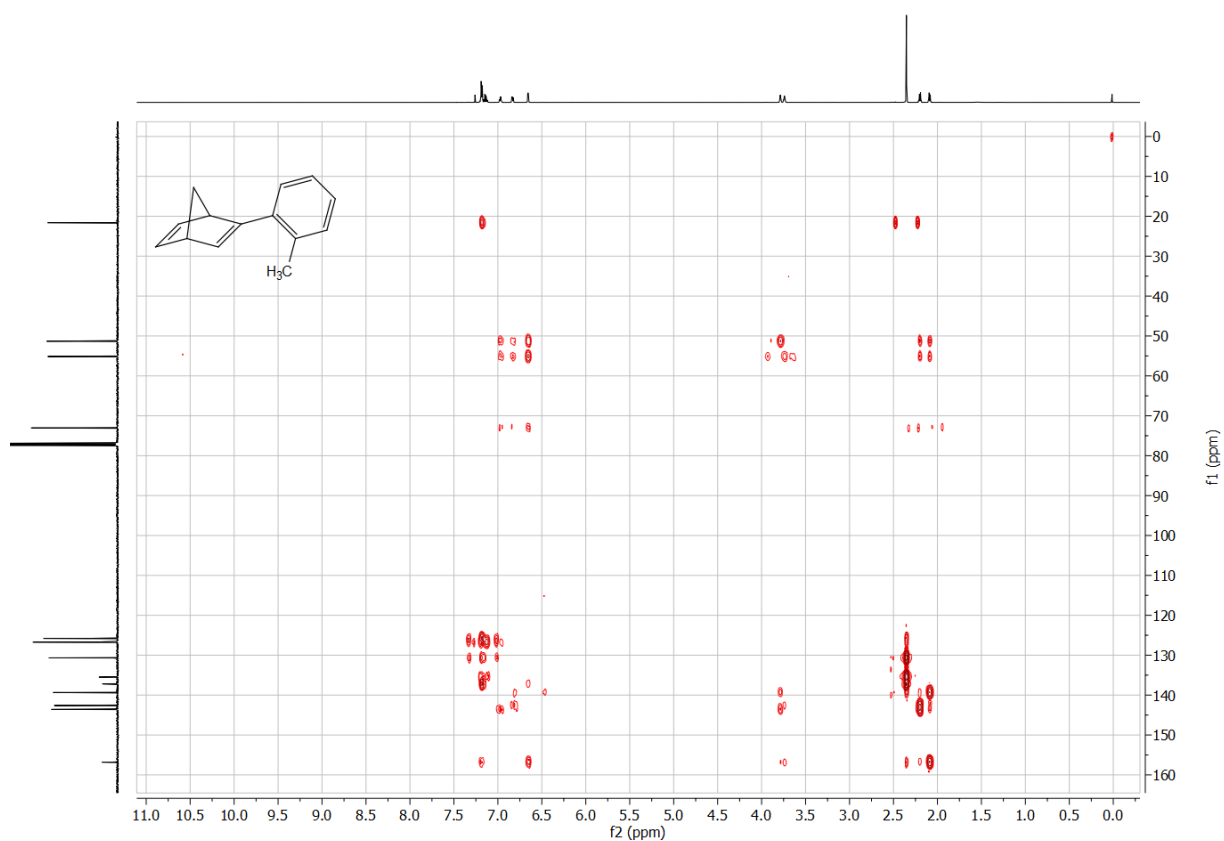

**Figure S25:** HMBC-NMR spectrum of **5c** (500 MHz, 125 MHz) in  $\text{CDCl}_3$ .

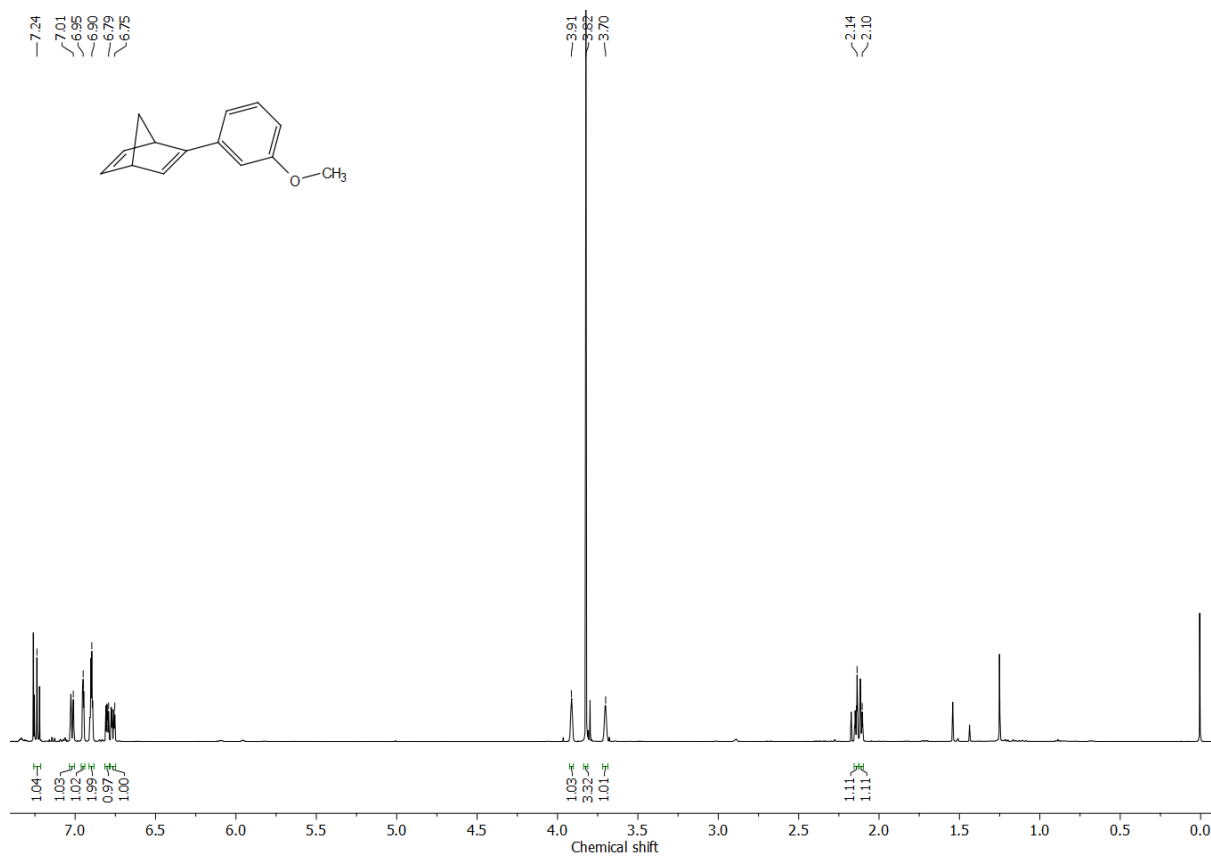

**Figure S26:**  $^1\text{H}$  NMR spectrum of **5e** (500 MHz) in  $\text{CDCl}_3$ .

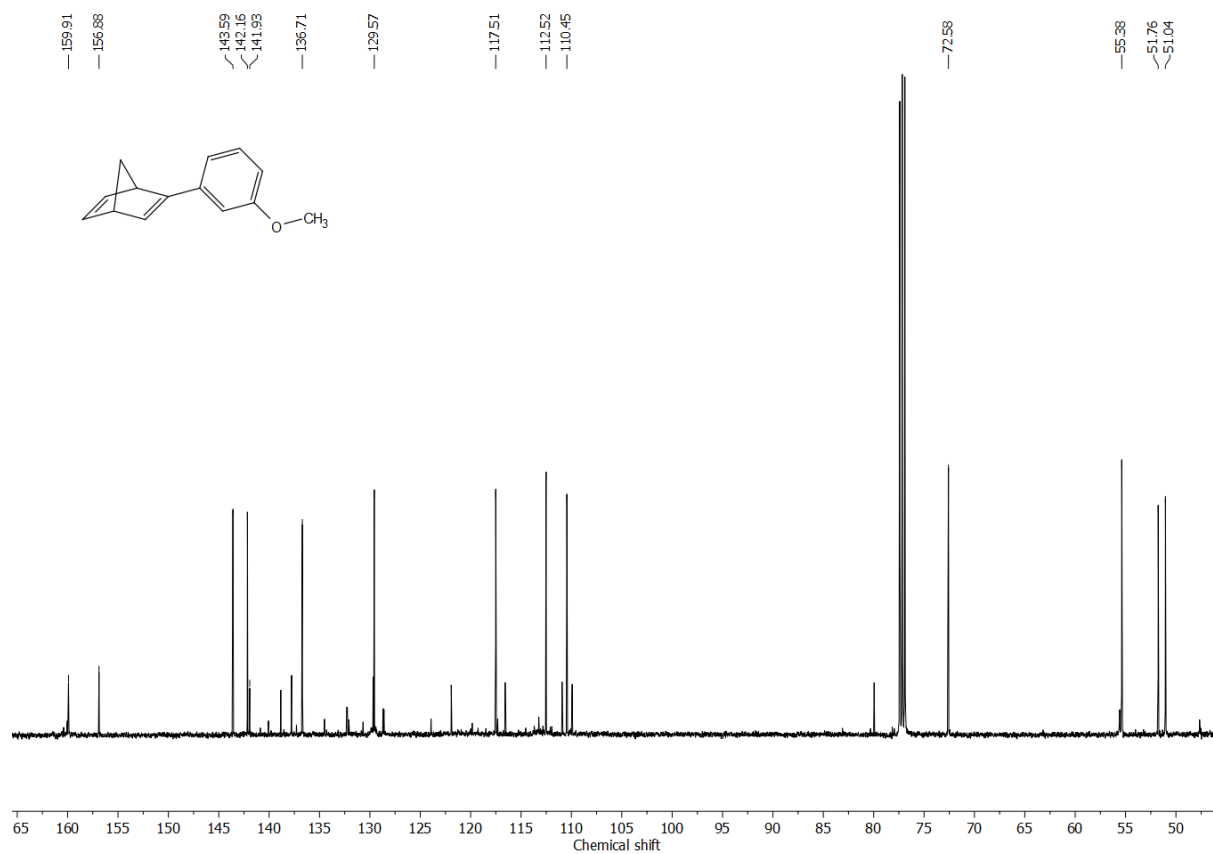

**Figure S27:**  $^{13}\text{C}$  NMR spectrum of **5e** (125 MHz) in  $\text{CDCl}_3$ .

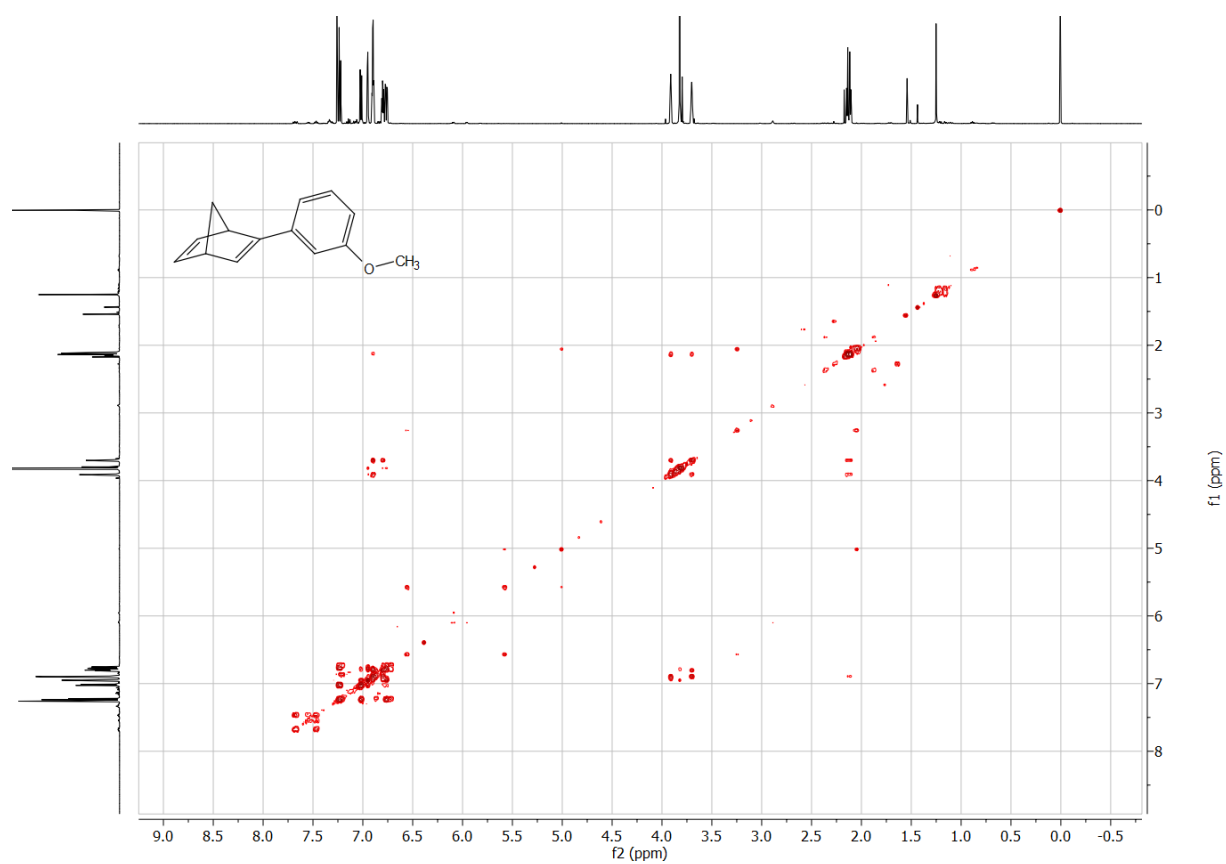

**Figure S28:** H,H-COSY-NMR spectrum of **5e** (500 MHz, 500 MHz) in  $\text{CDCl}_3$ .

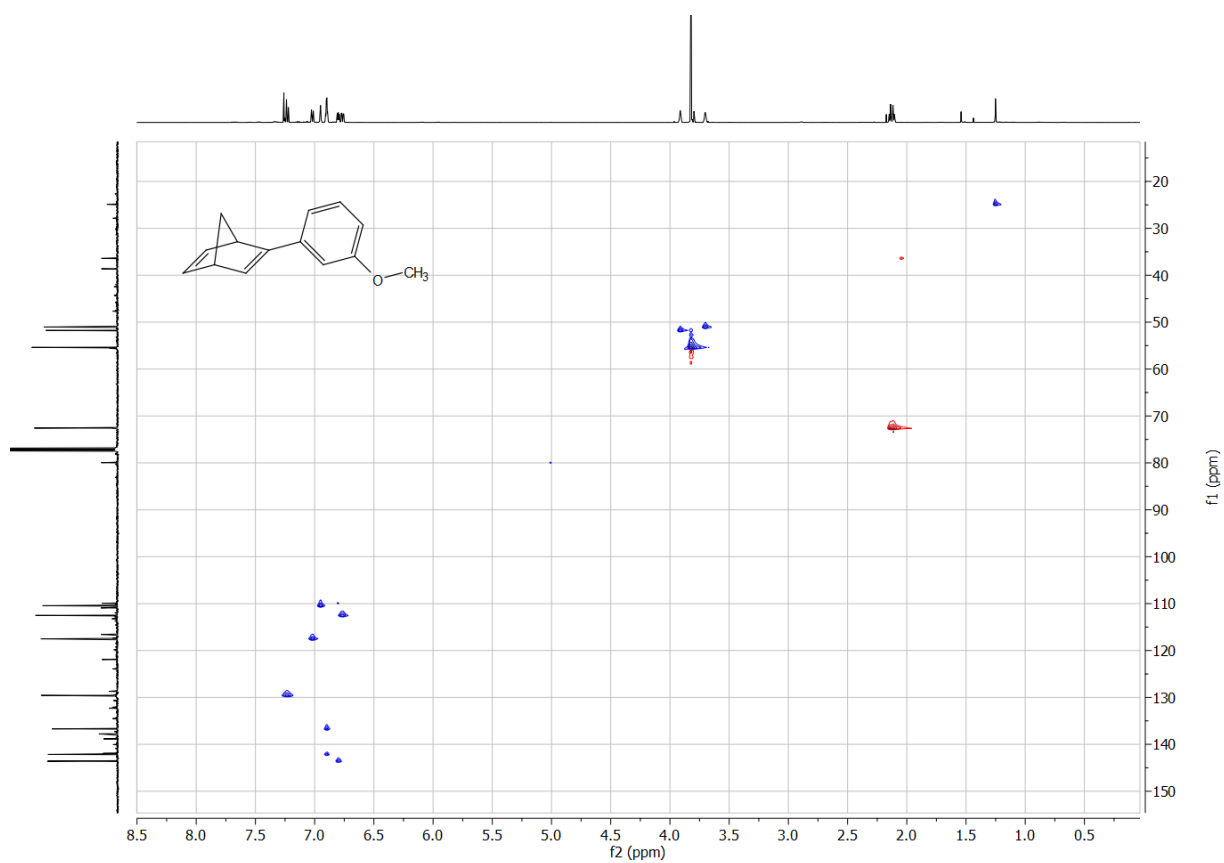

Figure S29: HSQC-NMR spectrum of **5e** (500 MHz, 125 MHz) in  $\text{CDCl}_3$ .

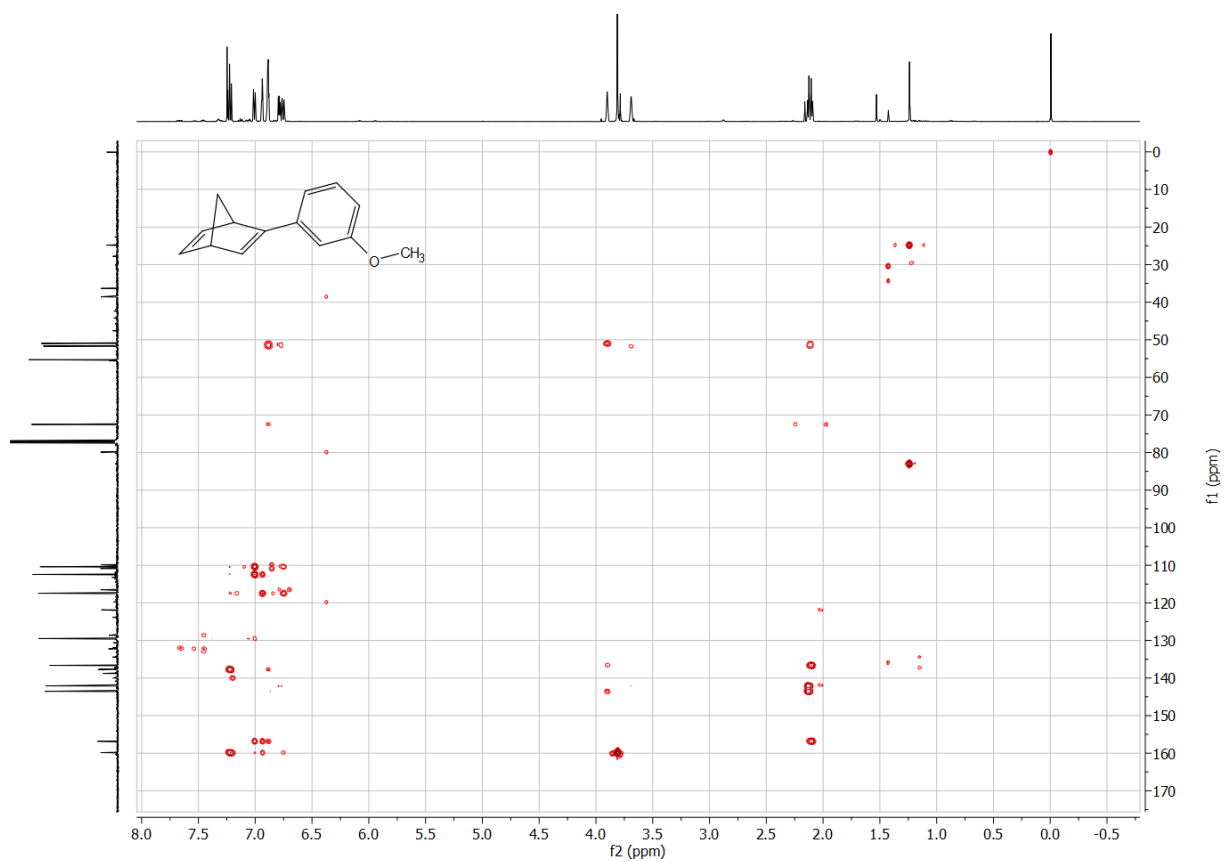

Figure S30: HMBC-NMR spectrum of **5e** (500 MHz, 125 MHz) in  $\text{CDCl}_3$ .



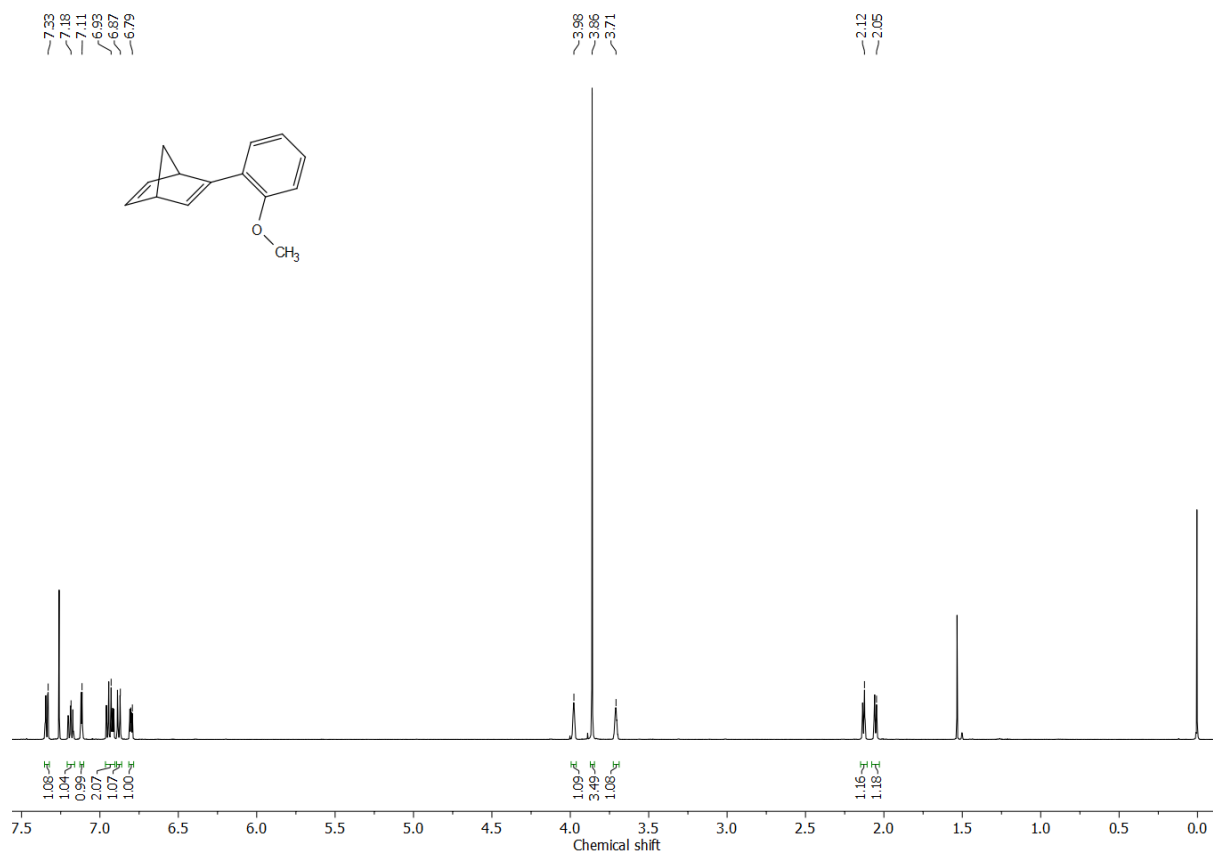

**Figure S31:** <sup>1</sup>H NMR spectrum of **5f** (500 MHz) in CDCl<sub>3</sub>.

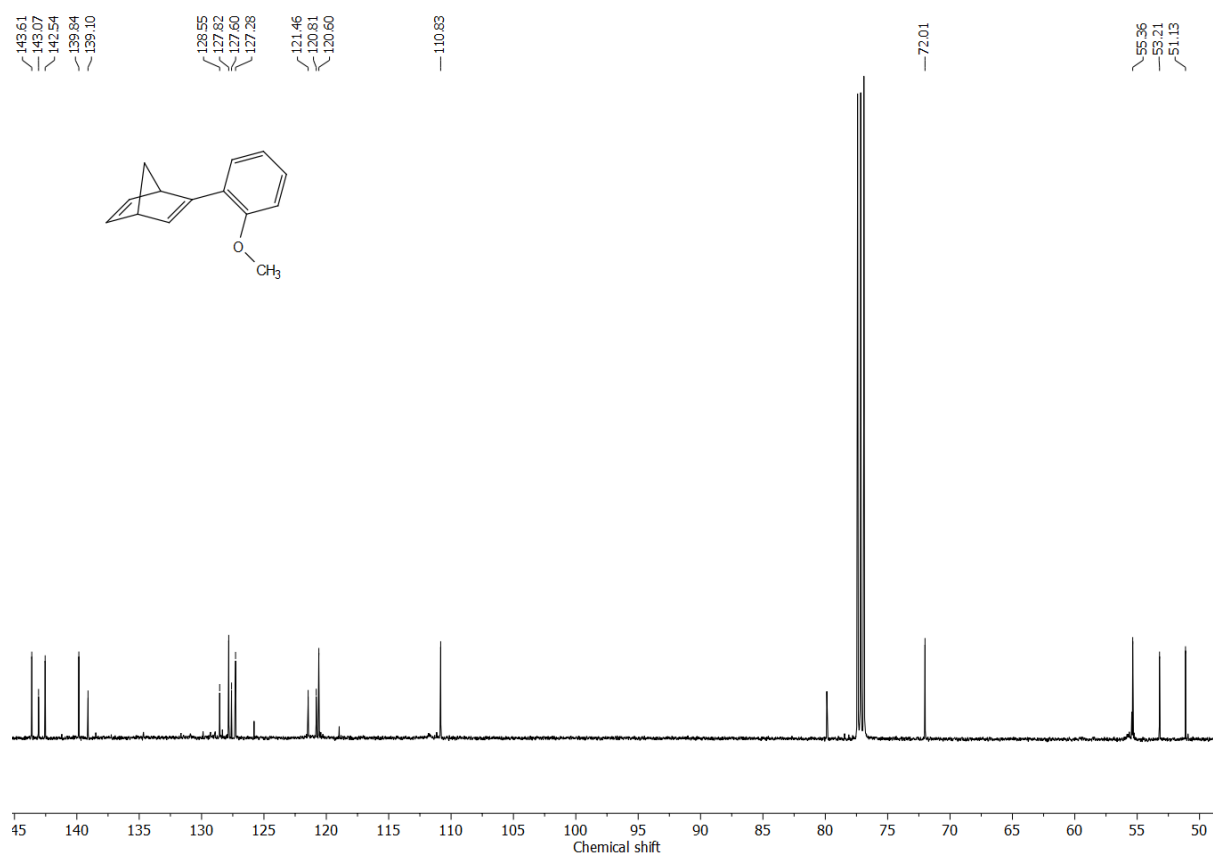

**Figure S32:** <sup>13</sup>C NMR spectrum of **5f** (125 MHz) in CDCl<sub>3</sub>.

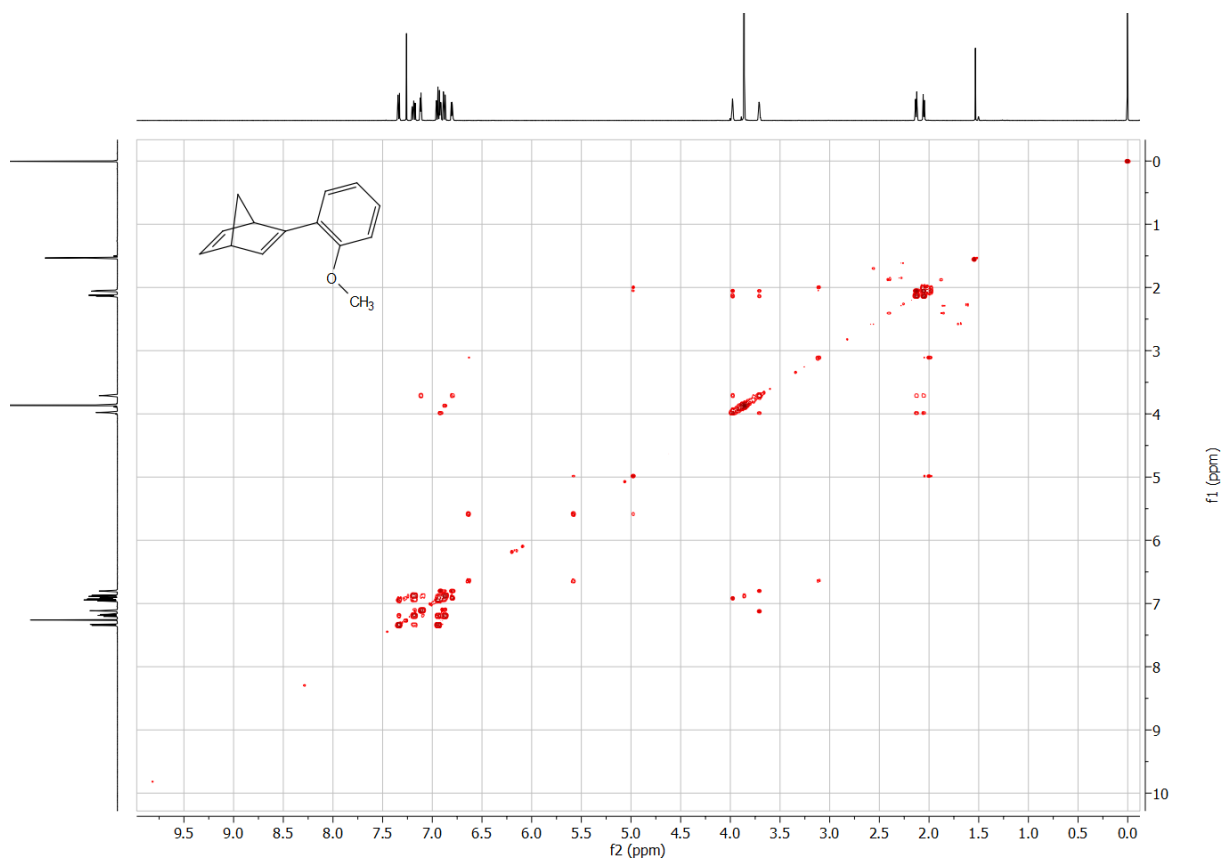

Figure S33: H,H-COSY-NMR spectrum of **5f** (500 MHz, 500 MHz) in CDCl<sub>3</sub>.

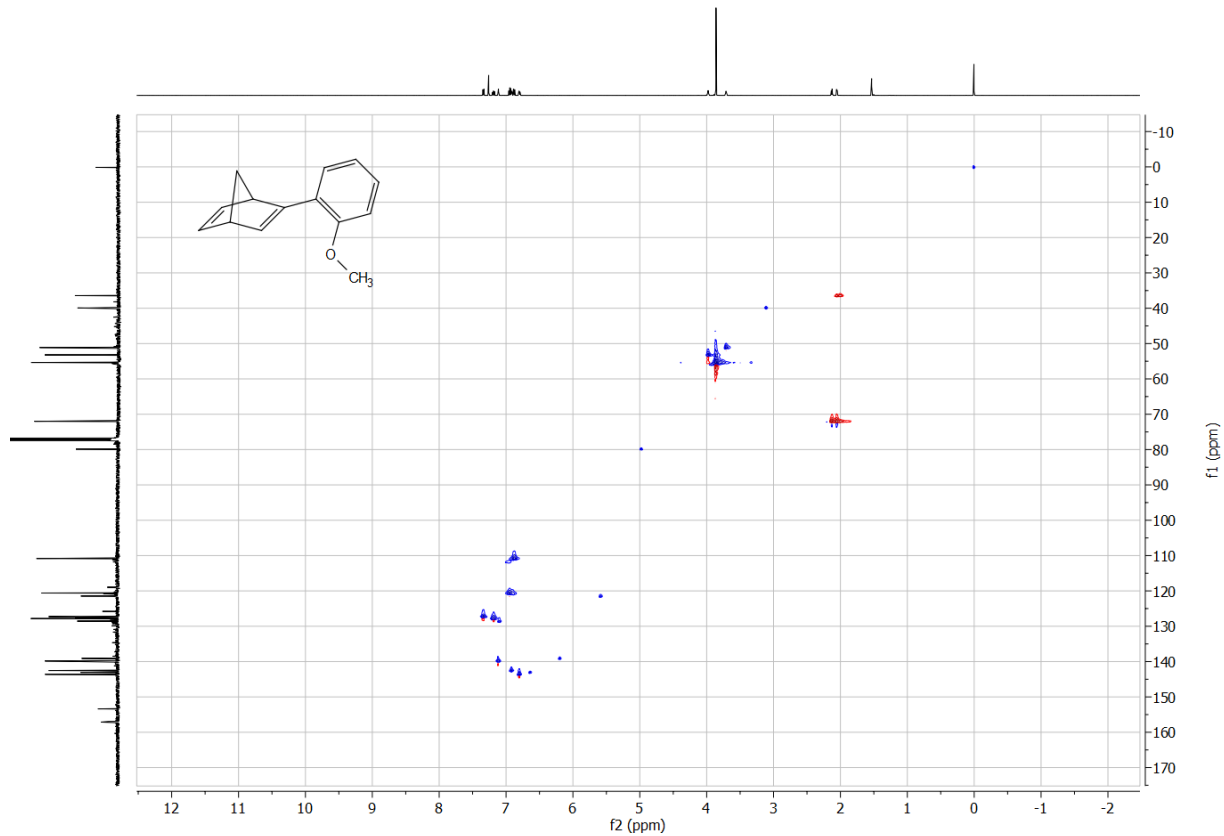

Figure S34: HSQC-NMR spectrum of **5f** (500 MHz, 125 MHz) in CDCl<sub>3</sub>.

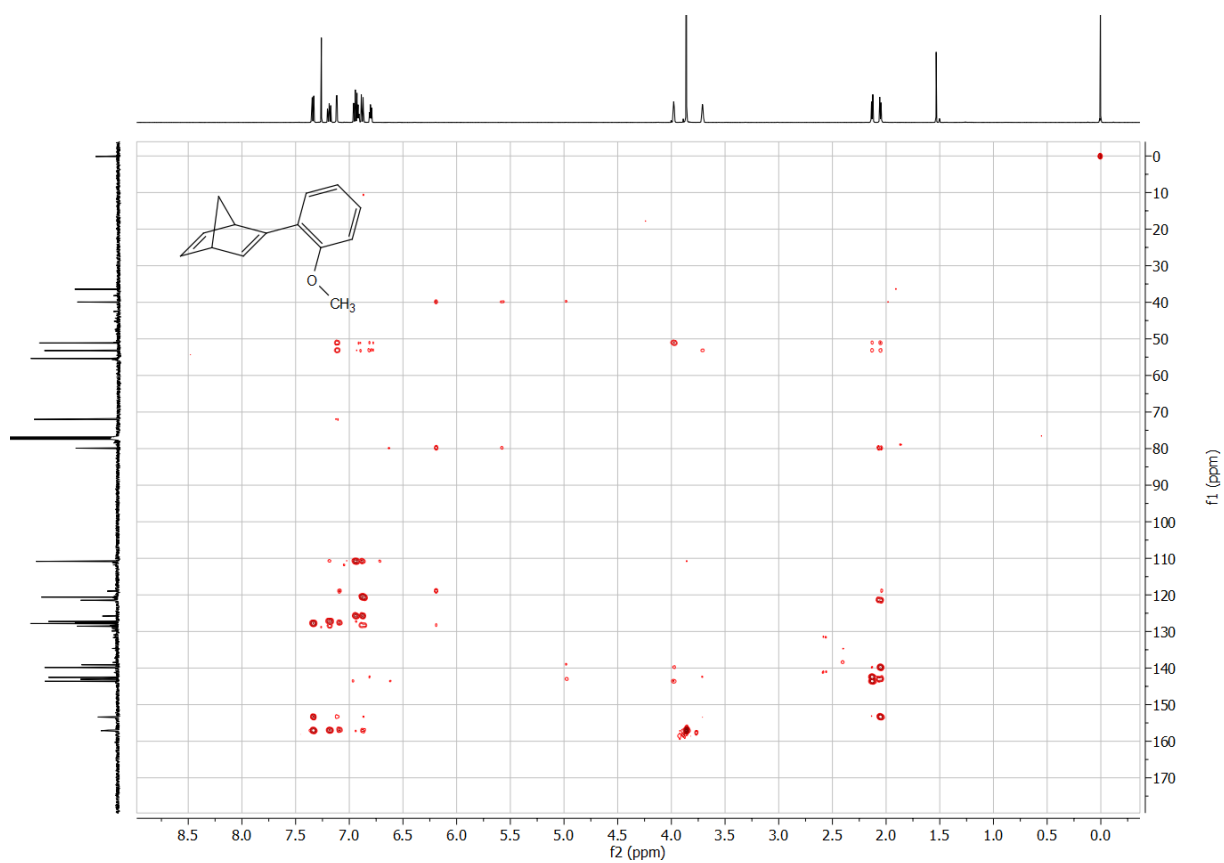

**Figure S35:** HMBC-NMR spectrum of **5f** (500 MHz, 125 MHz) in  $\text{CDCl}_3$ .

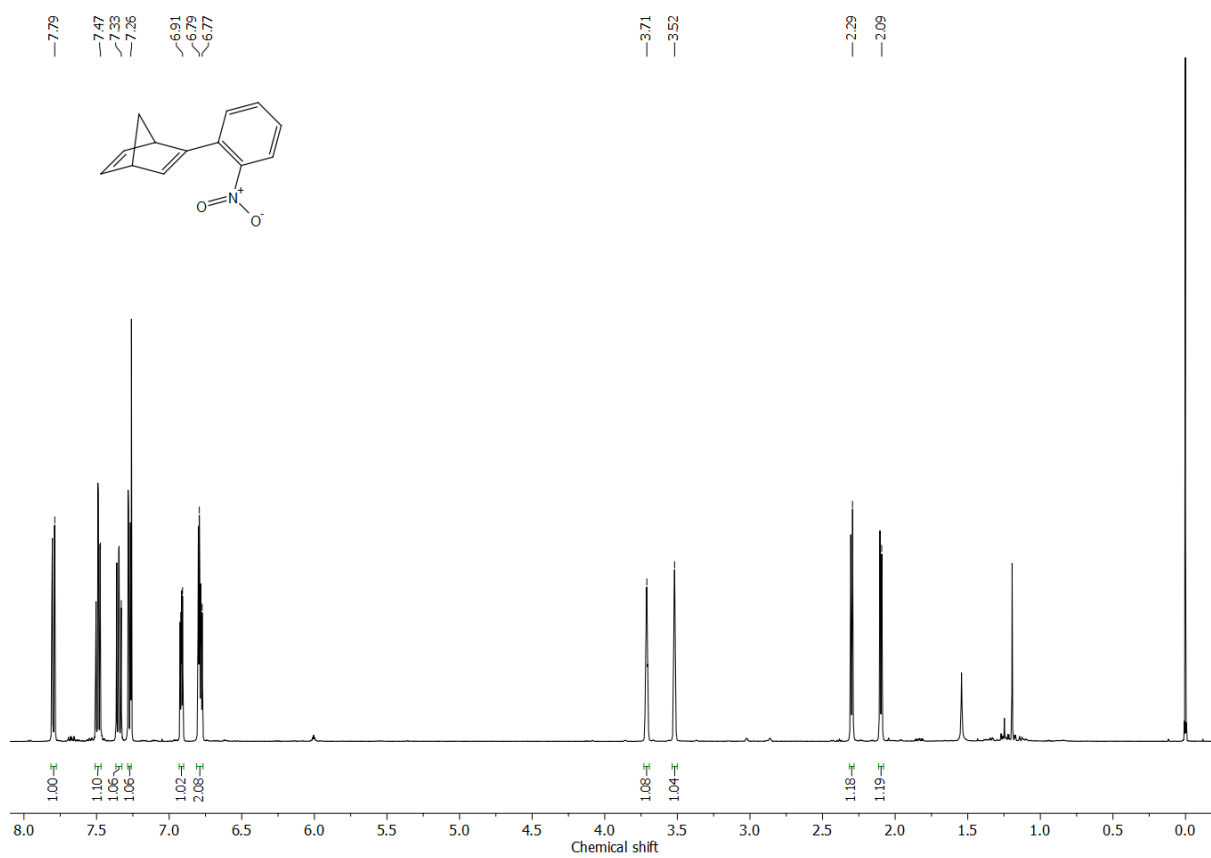

**Figure S36:**  $^1\text{H}$  NMR spectrum of **5h** (500 MHz) in  $\text{CDCl}_3$ .

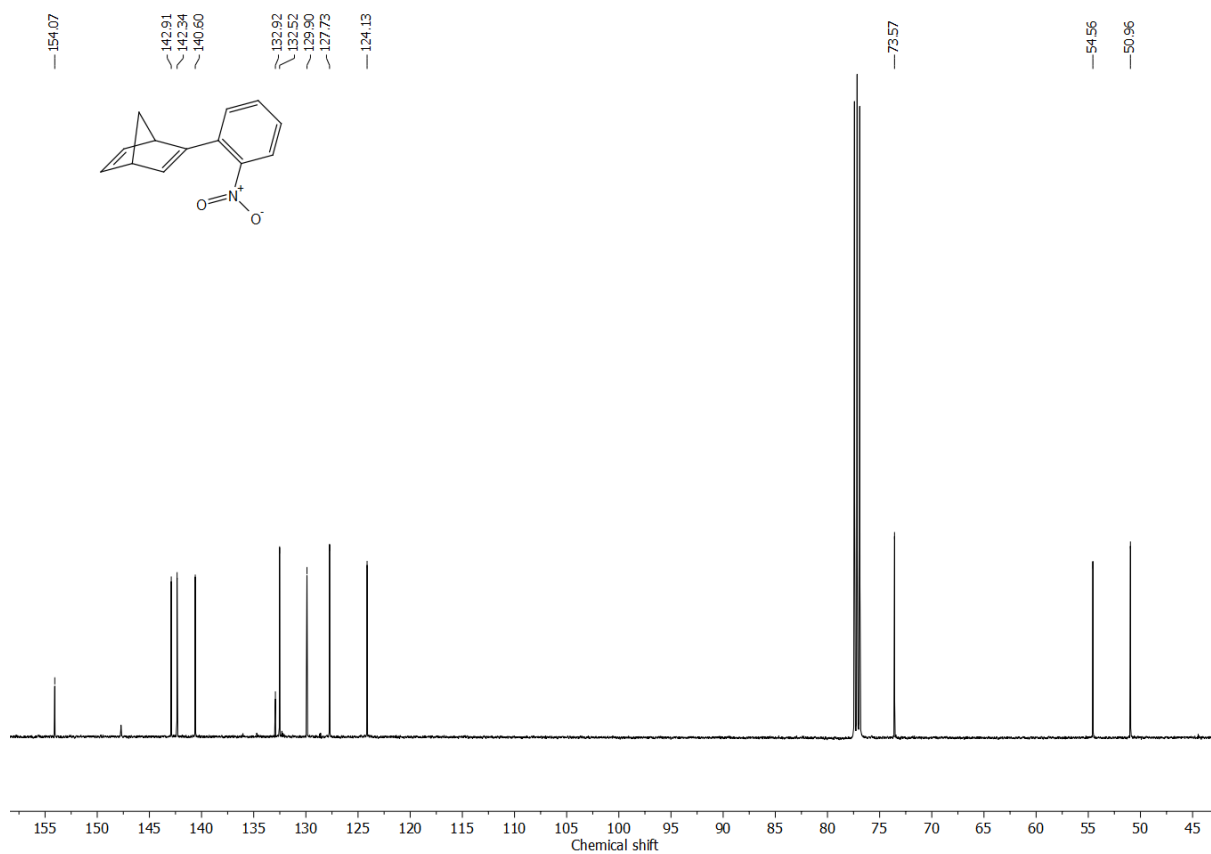

**Figure S37:**  $^{13}\text{C}$  NMR spectrum of **5h** (125 MHz) in  $\text{CDCl}_3$ .

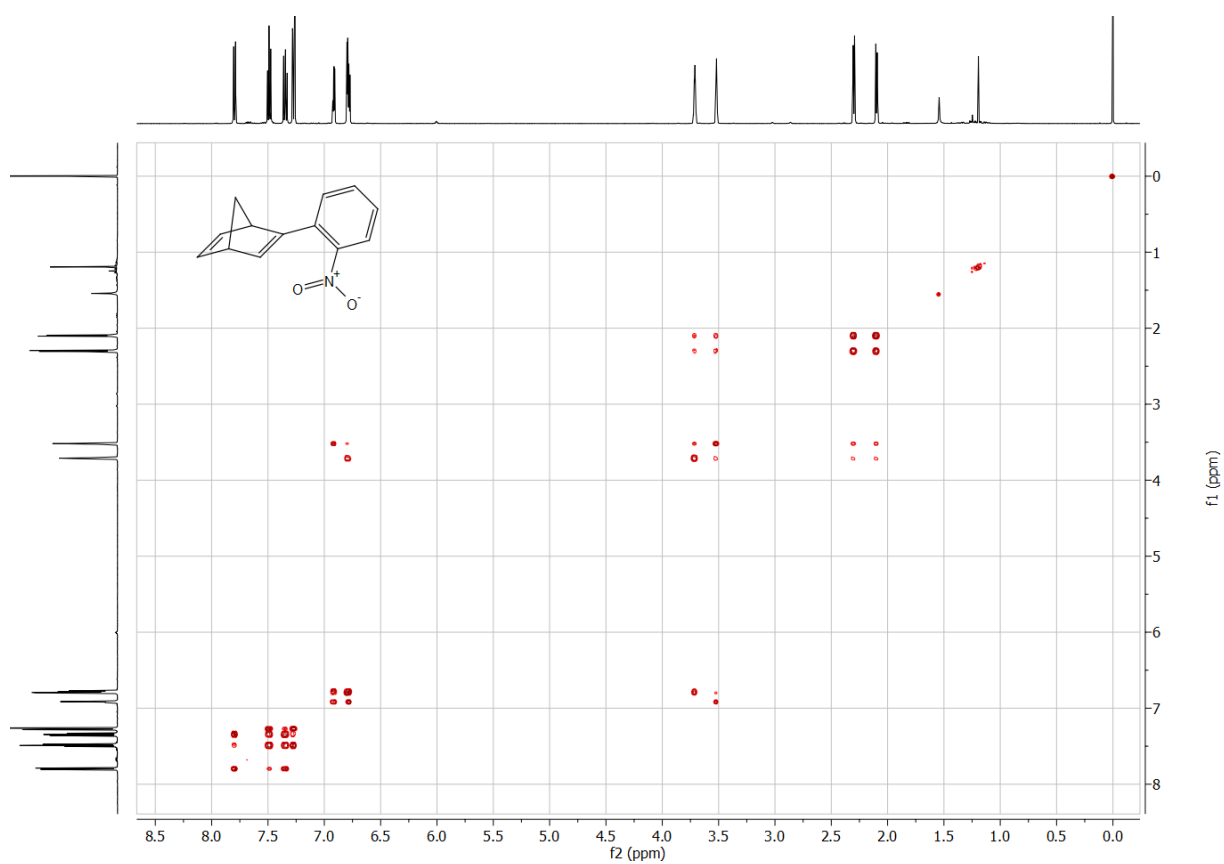

**Figure S38:** H,H-COSY-NMR spectrum of **5h** (500 MHz, 500 MHz) in  $\text{CDCl}_3$ .

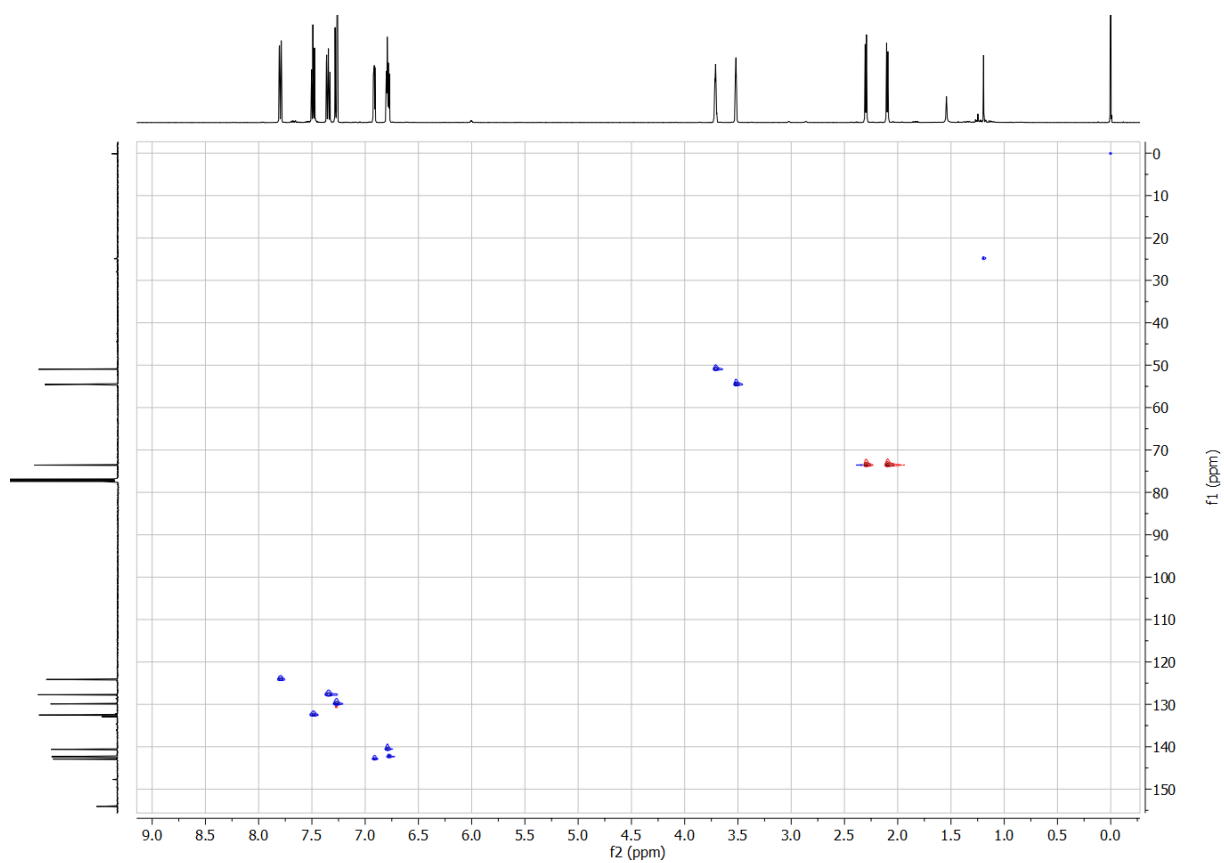

**Figure S39:** HSQC-NMR spectrum of **5h** (500 MHz, 125 MHz) in  $\text{CDCl}_3$ .

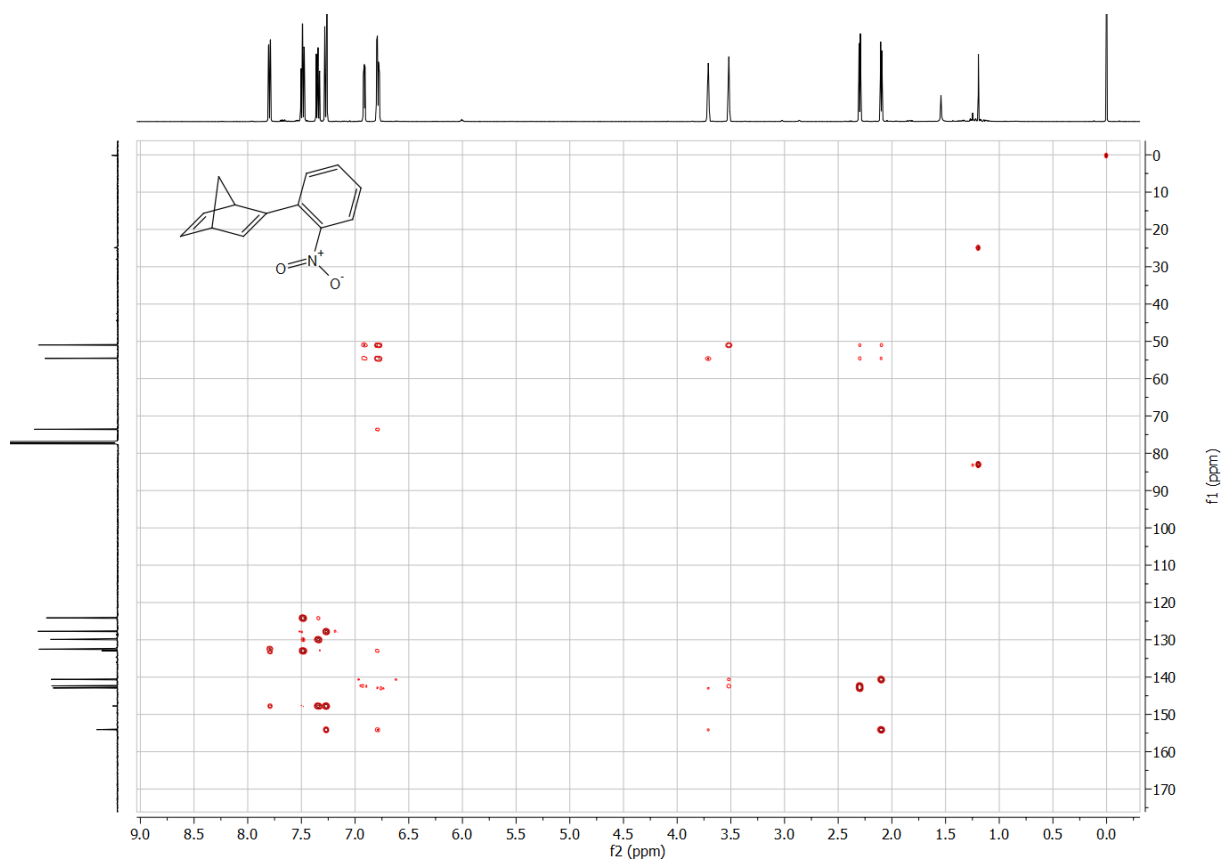

**Figure S40:** HMBC-NMR spectrum of **5h** (500 MHz, 125 MHz) in  $\text{CDCl}_3$ .

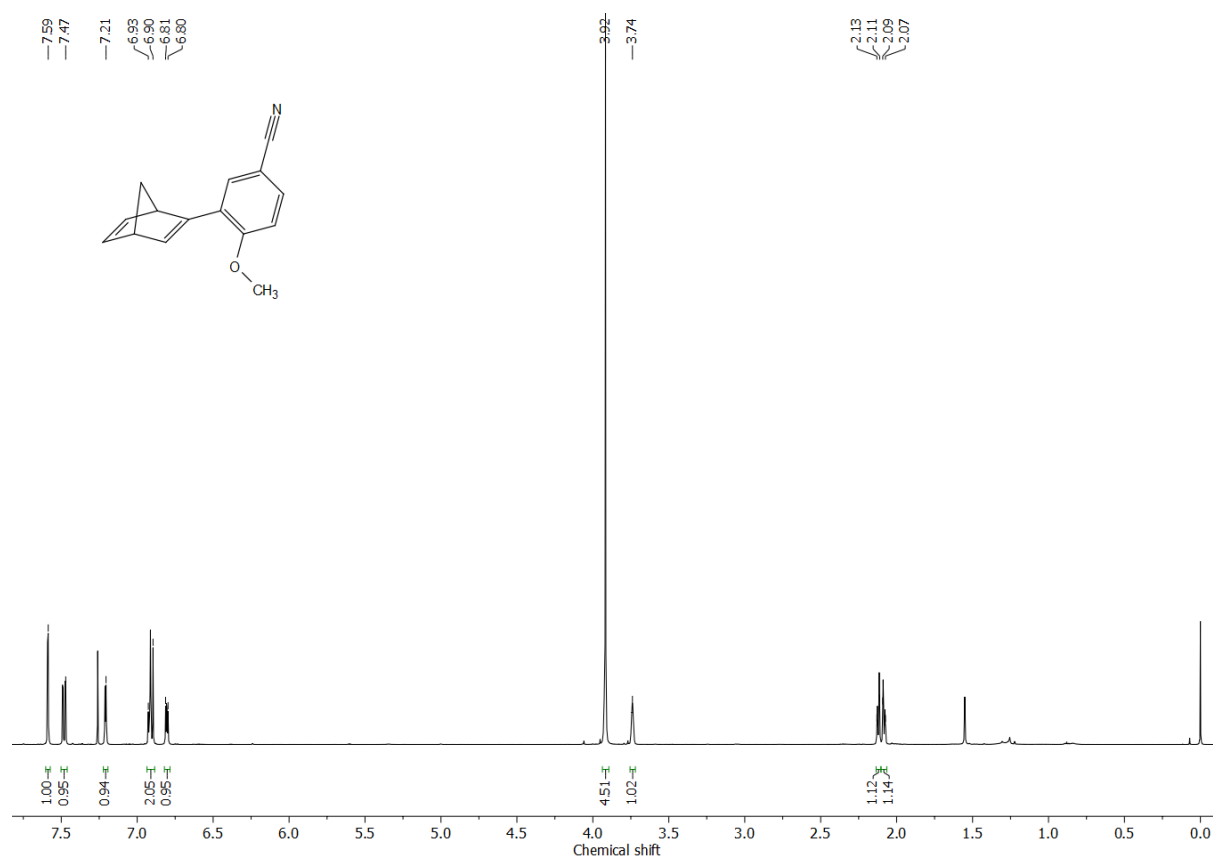

**Figure S41:**  $^1\text{H}$  NMR spectrum of **5i** (500 MHz) in  $\text{CDCl}_3$ .

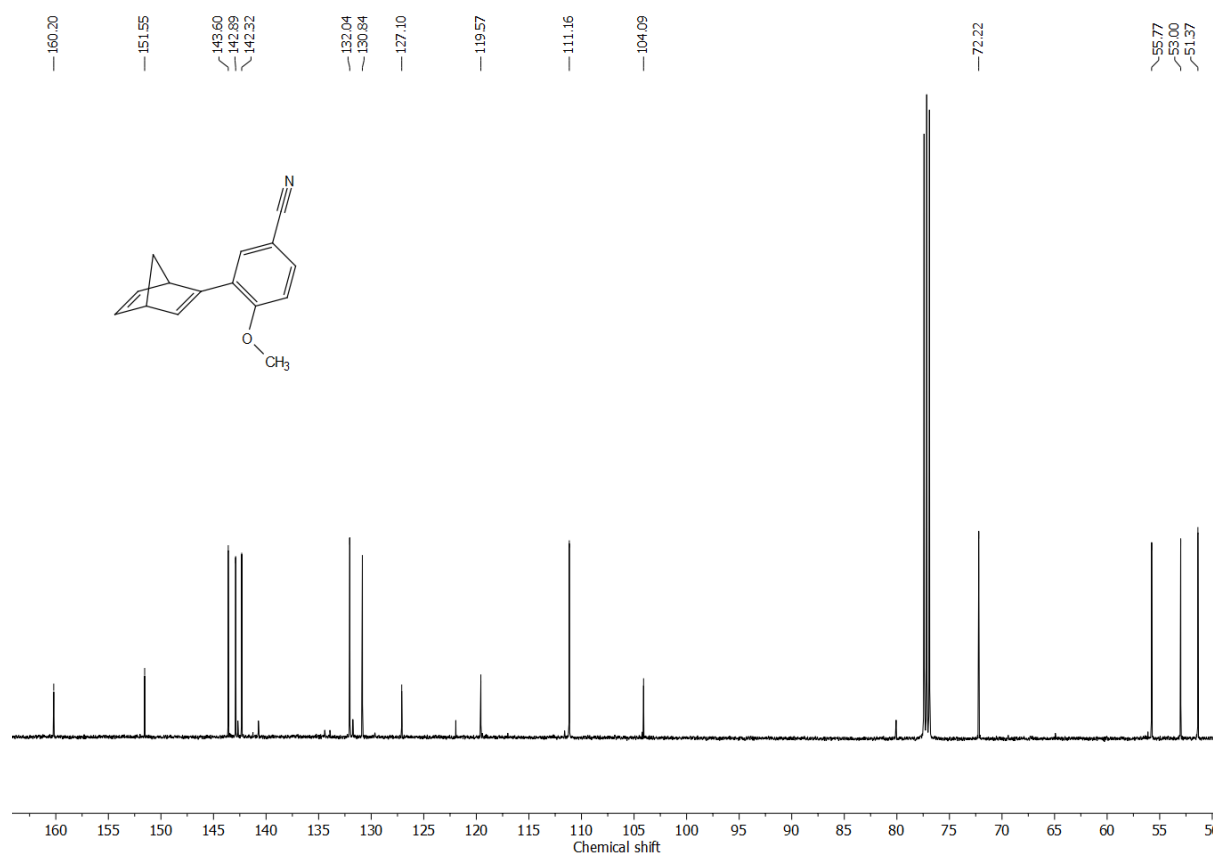

**Figure S42:**  $^{13}\text{C}$  NMR spectrum of **5i** (125 MHz) in  $\text{CDCl}_3$ .

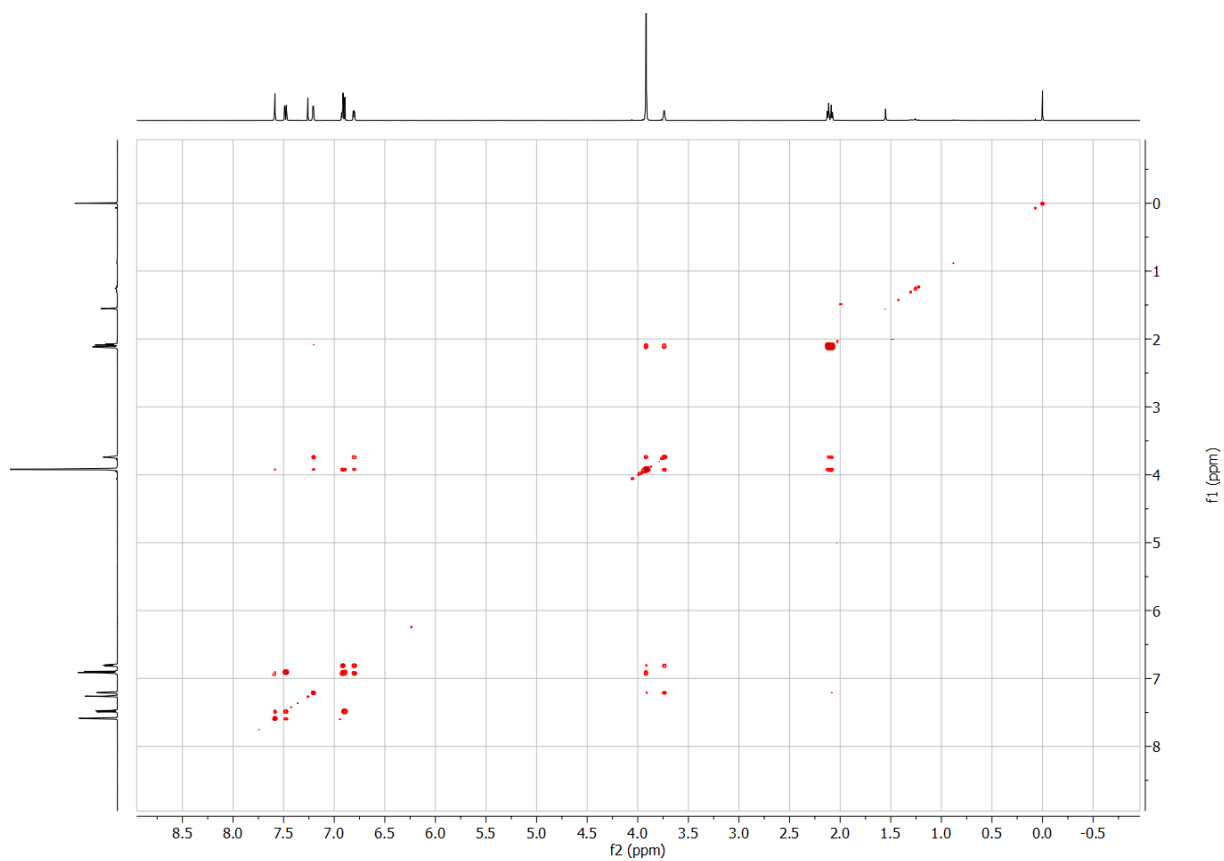

**Figure S43:** H,H-COSY-NMR spectrum of **5i** (500 MHz, 500 MHz) in CDCl<sub>3</sub>.

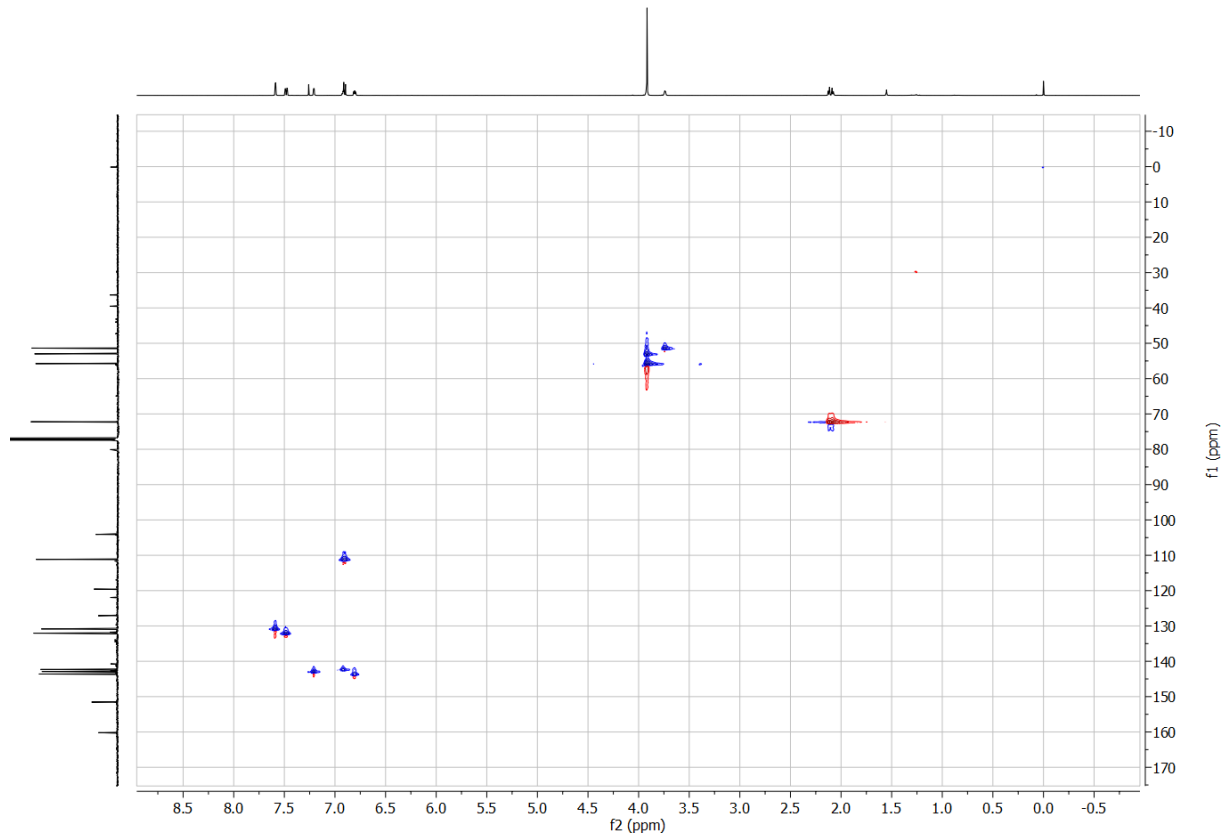

**Figure S44:** HSQC-NMR spectrum of **5i** (500 MHz, 125 MHz) in CDCl<sub>3</sub>.

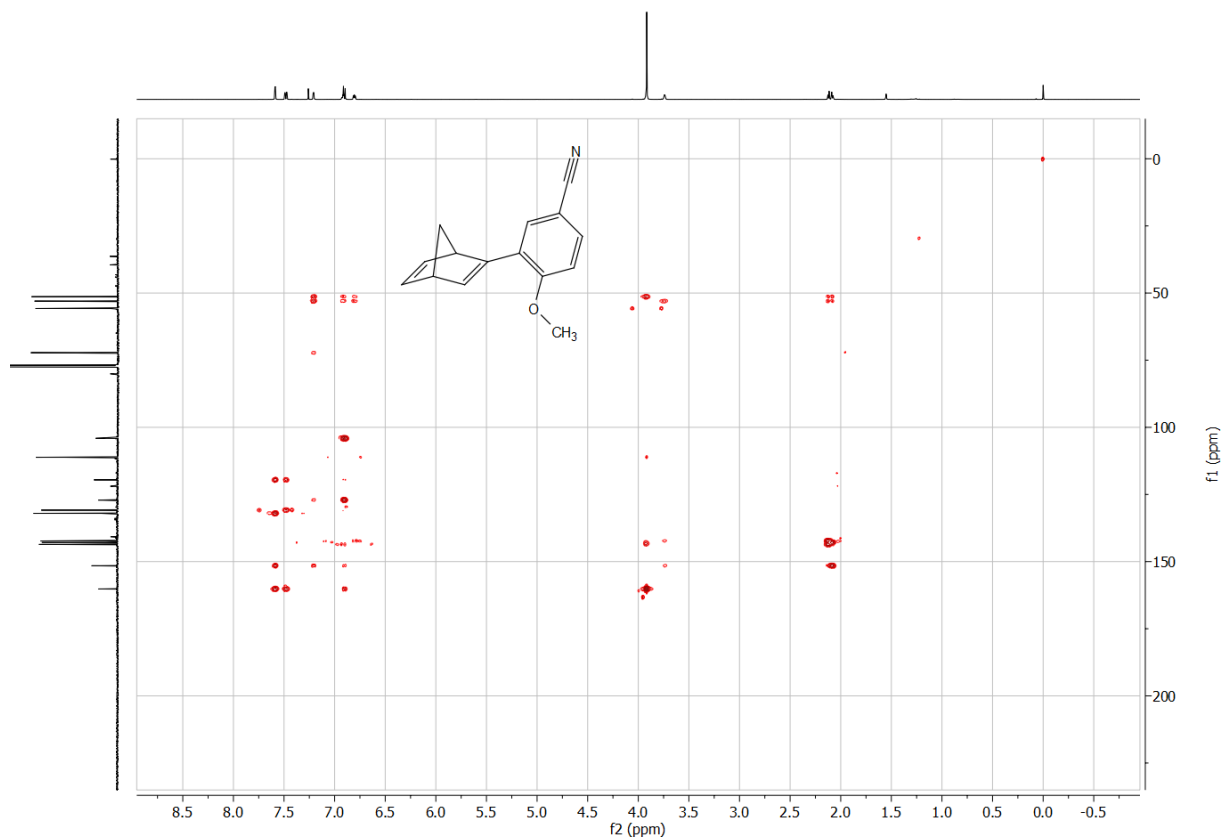

Figure S45: HMBC-NMR spectrum of **5i** (500 MHz, 125 MHz) in CDCl<sub>3</sub>.

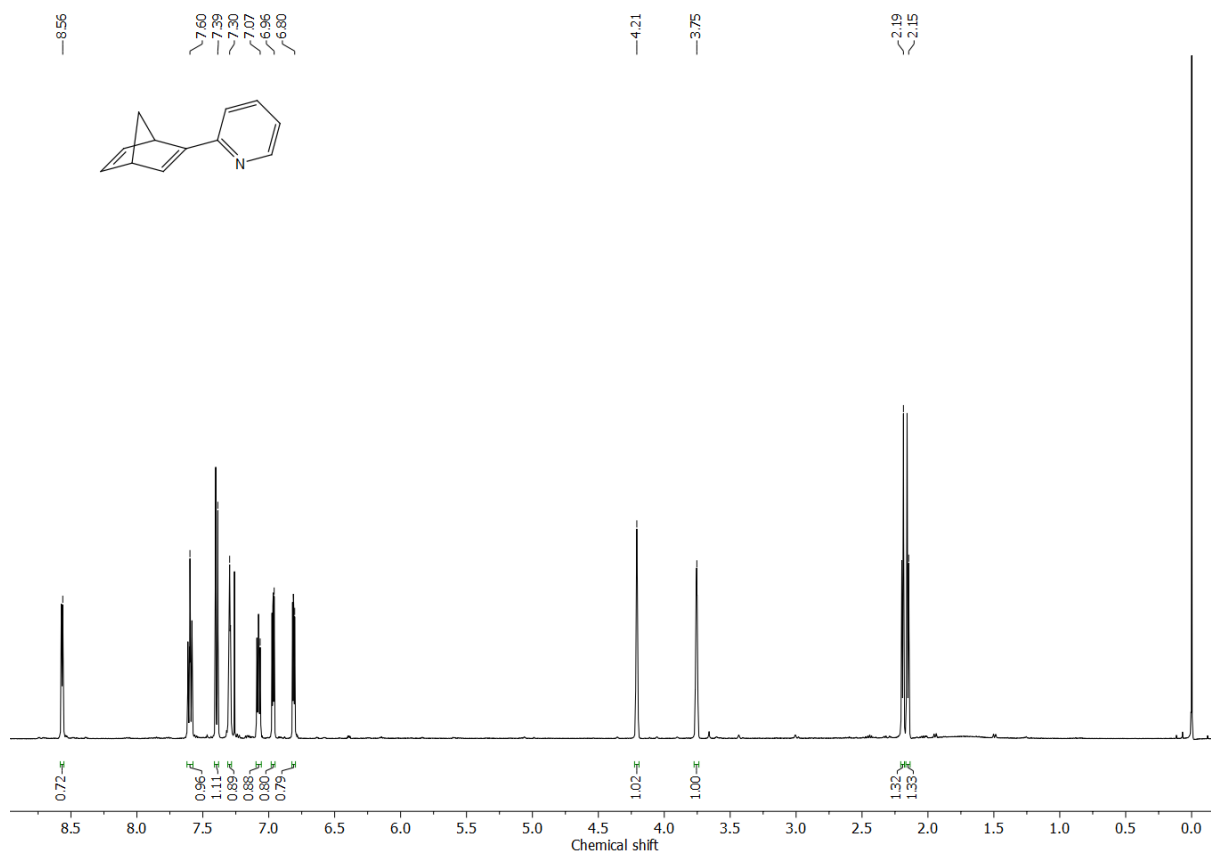

Figure S46: <sup>1</sup>H NMR spectrum of **5j** (500 MHz) in CDCl<sub>3</sub>.



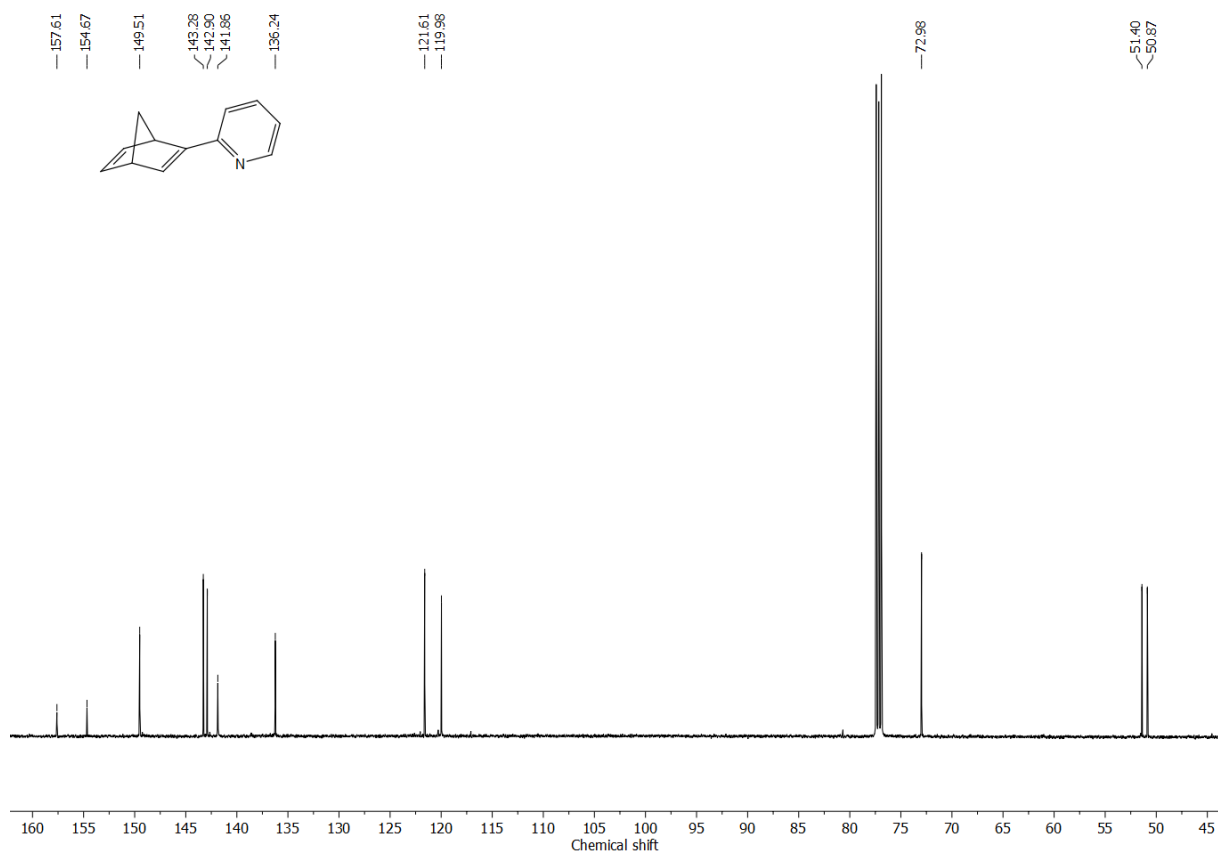

**Figure S47:**  $^{13}\text{C}$  NMR spectrum of **5j** (125 MHz) in  $\text{CDCl}_3$ .

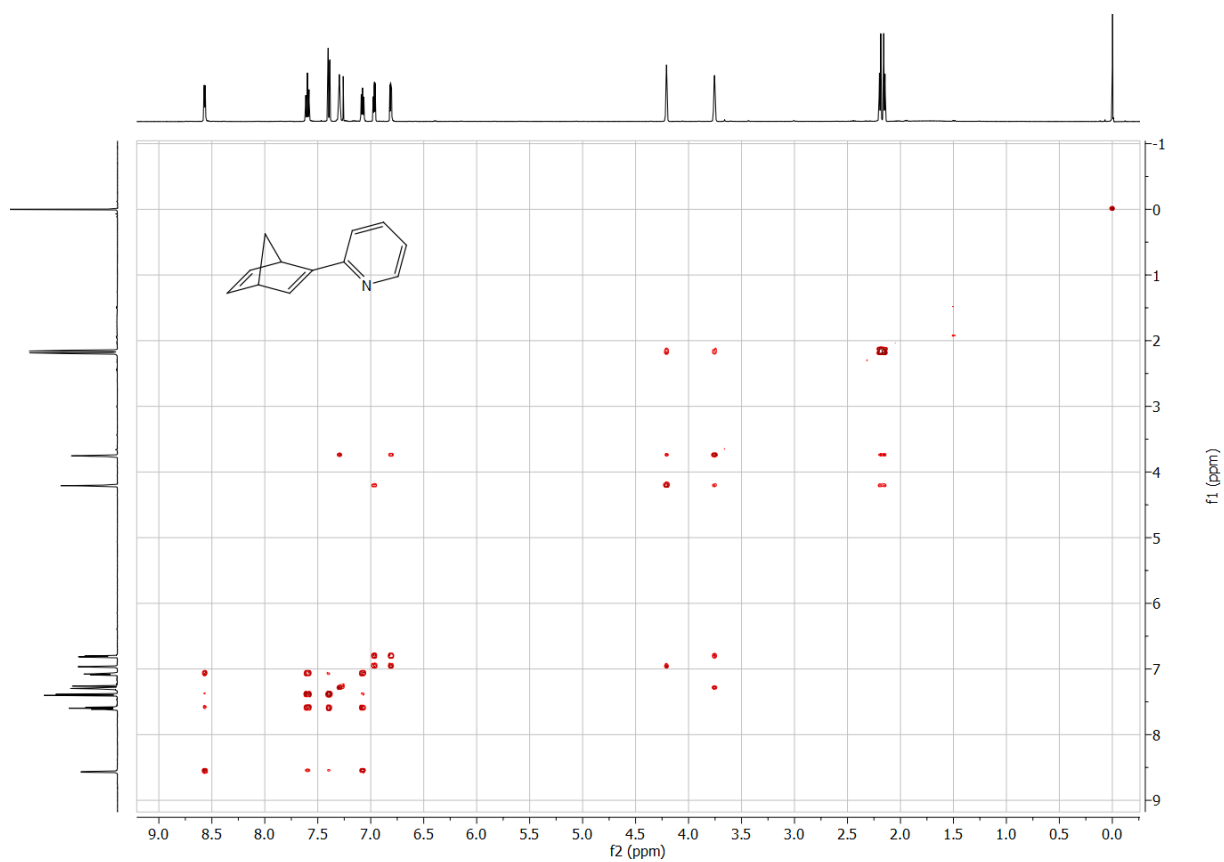

**Figure S48:** H,H-COSY-NMR spectrum of **5j** (500 MHz, 500 MHz) in  $\text{CDCl}_3$ .

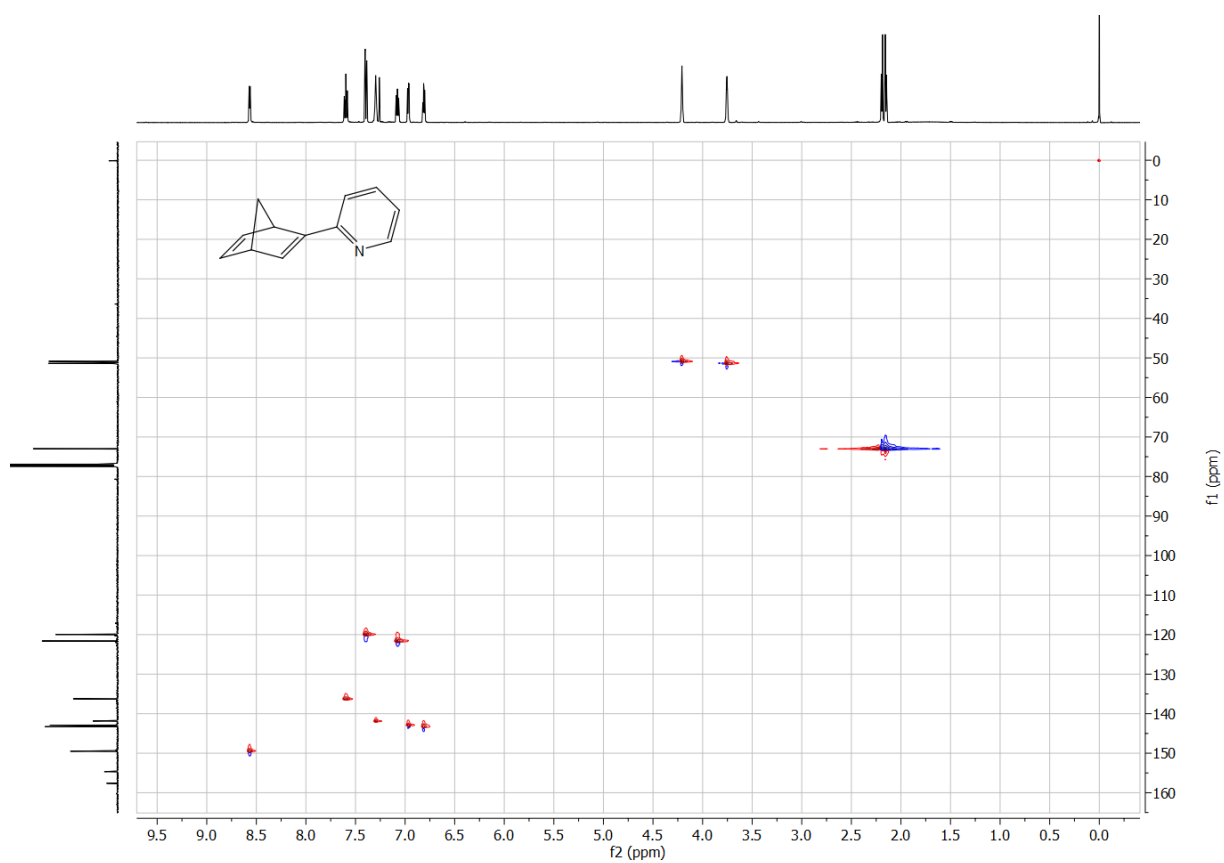

Figure S49: HSQC-NMR spectrum of **5j** (500 MHz, 125 MHz) in CDCl<sub>3</sub>.

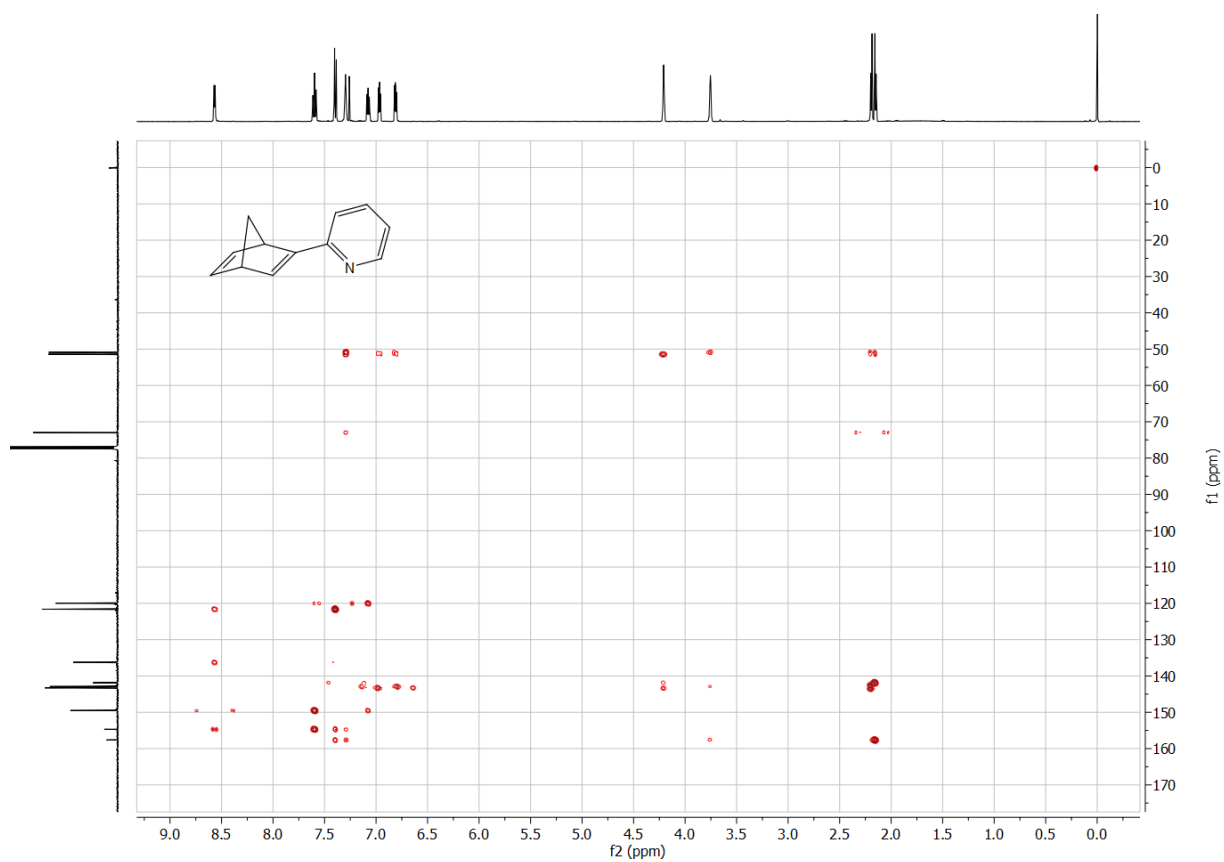

Figure S50: HMBC-NMR spectrum of **5j** (500 MHz, 125 MHz) in CDCl<sub>3</sub>.

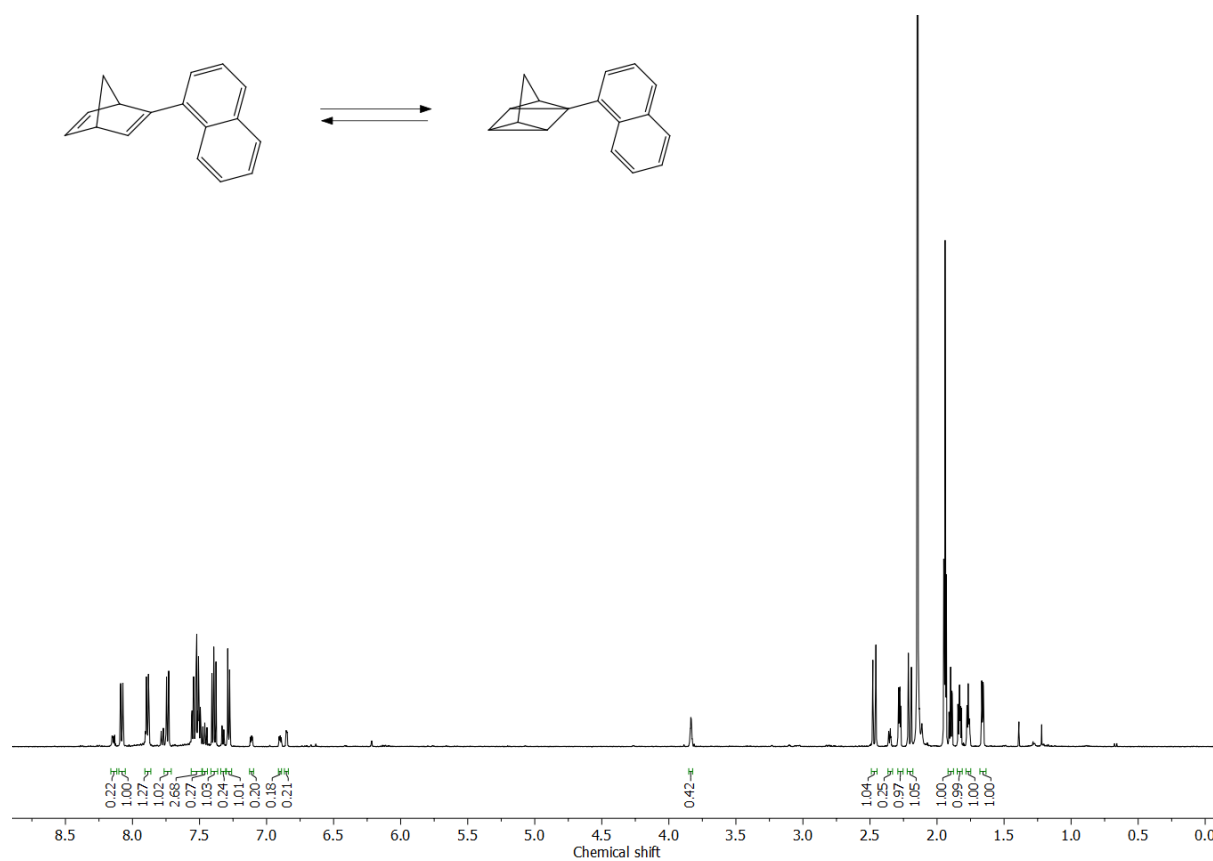

**Figure S51:**  $^1\text{H}$  NMR spectrum (500 MHz) of the photo stationary state in  $\text{CD}_3\text{CN}$ .

### 3 References

1. Tranmer, G. K.; Yip, C.; Handerson, S.; Jordan, R. W.; Tam, W. *Can. J. Chem.* **2000**, *78*, 527–535.
2. Chang, C.-S.; Lin, Y.-T.; Shih, S.-R.; Lee, C.-C.; Lee, Y.-C.; Tai, C.-L.; Tseng, S.-N.; Chern, J.-H. *J. Med. Chem.* **2005**, *48*, 3522–3535.
3. Back, T. G.; Zhai, H. *Chem. Commun.* **2006**, 326–328.
4. OriginLab Corporation, OriginPro 8.5.1, Northampton, MA, USA, 2011.
